# Supplementary material for: Cyclodextrin ketones as oxidation catalysts: Investigation of bridged derivatives
Source: Royal Society of Chemistry journal article supplement (doi:10.1039/b814245a), 2009-01-01

*Supplementary information for*  
**Cyclodextrin ketones as oxidation catalysts:  
Investigation of bridged derivatives.**

*Thomas Hauch Fenger, Lavinia G. Marinescu and Mikael Bols\**

*Department of Chemistry, University of Aarhus, DK-8000, Denmark, [mb@chem.au.dk](mailto:mb@chem.au.dk)*

Index

1. <sup>1</sup>H spectra of compound 9 page 3
2. <sup>13</sup>C spectrum of compound 9 page 4
3. <sup>1</sup>H spectra of compound 10 page 5
4. <sup>13</sup>C spectrum of compound 10 page 6
5. <sup>1</sup>H spectra of compound 11 page 7
6. <sup>13</sup>C spectrum of compound 11 page 8
7. <sup>1</sup>H spectra of compound 13 page 9
8. <sup>13</sup>C spectrum of compound 13 page 10
9. <sup>1</sup>H spectra of compound 14 page 11
10. <sup>13</sup>C spectrum of compound 14 page 12
11. <sup>1</sup>H spectra of compound 15 page 13
12. <sup>13</sup>C spectrum of compound 15 page 14
13. <sup>13</sup>C spectrum of compound 16 page 15
14. <sup>1</sup>H spectra of compound 17 page 16
15. <sup>1</sup>H spectra of compound 18 page 17

|                                             |         |
|---------------------------------------------|---------|
| 16. $^{13}\text{C}$ spectrum of compound 18 | page 18 |
| 17. $^1\text{H}$ spectra of compound 25     | page 19 |
| 18. $^{13}\text{C}$ spectrum of compound 25 | page 20 |
| 19. $^1\text{H}$ spectra of compound 26     | page 21 |
| 20. $^{13}\text{C}$ spectrum of compound 26 | page 22 |
| 21. $^1\text{H}$ spectra of compound 27     | page 23 |
| 22. $^{13}\text{C}$ spectrum of compound 27 | page 24 |
| 23. $^1\text{H}$ spectra of compound 28     | page 25 |
| 24. $^{13}\text{C}$ spectrum of compound 28 | page 26 |
| 25. $^1\text{H}$ spectra of compound 31     | page 27 |
| 26. $^{13}\text{C}$ spectrum of compound 31 | page 28 |
| 27. $^1\text{H}$ spectra of compound 32     | page 29 |
| 28. $^{13}\text{C}$ spectrum of compound 32 | page 30 |
| 29. $^1\text{H}$ spectra of compound 33     | page 31 |
| 30. $^{13}\text{C}$ spectrum of compound 33 | page 32 |
| 31. $^1\text{H}$ spectra of compound 34     | page 33 |
| 32. $^{13}\text{C}$ spectrum of compound 34 | page 34 |
| 33. $^1\text{H}$ spectra of compound 35     | page 35 |
| 34. $^{13}\text{C}$ spectrum of compound 35 | page 36 |
| 35. $^1\text{H}$ spectra of compound 36     | page 37 |
| 36. $^{13}\text{C}$ spectrum of compound 36 | page 38 |

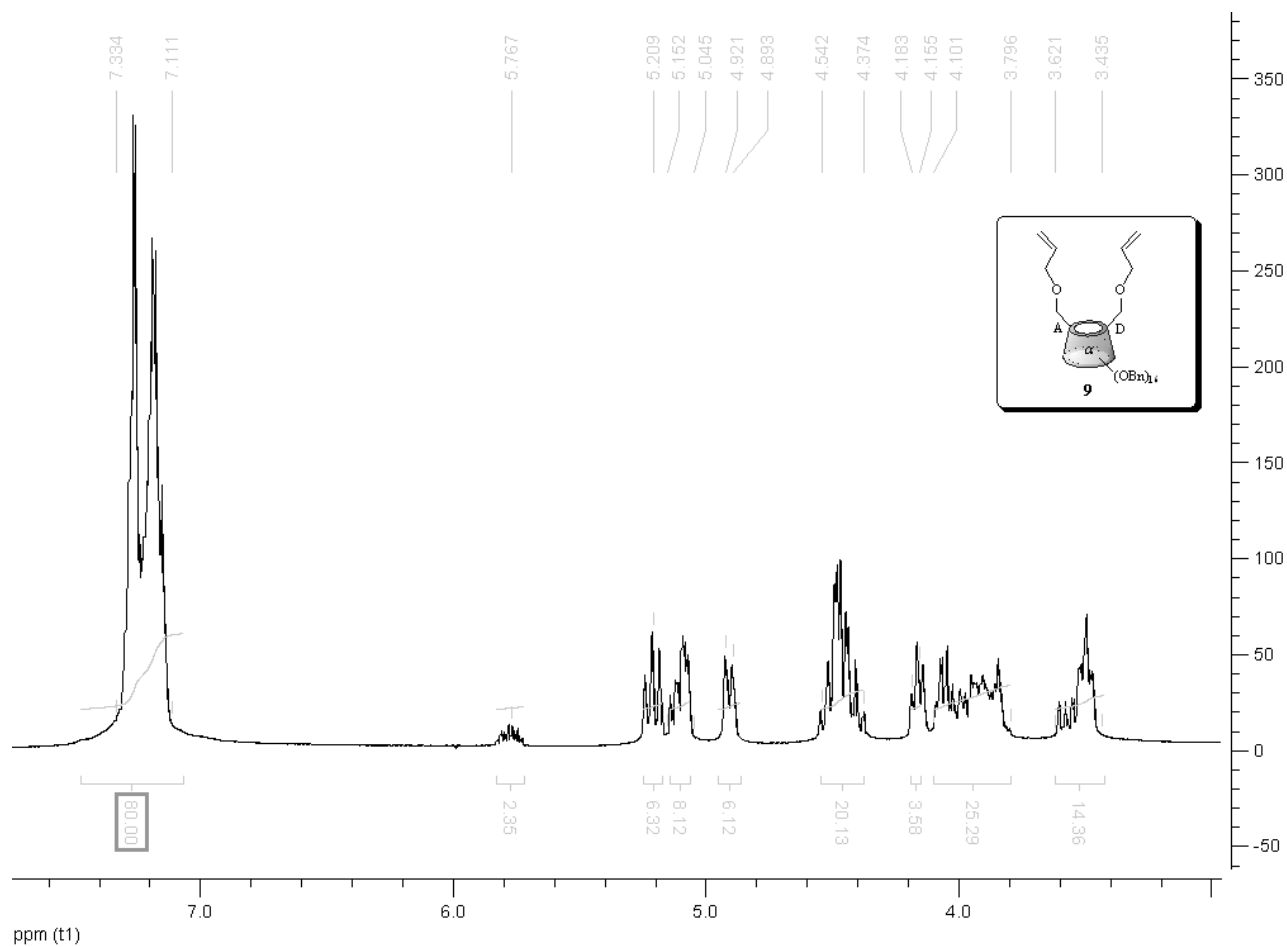

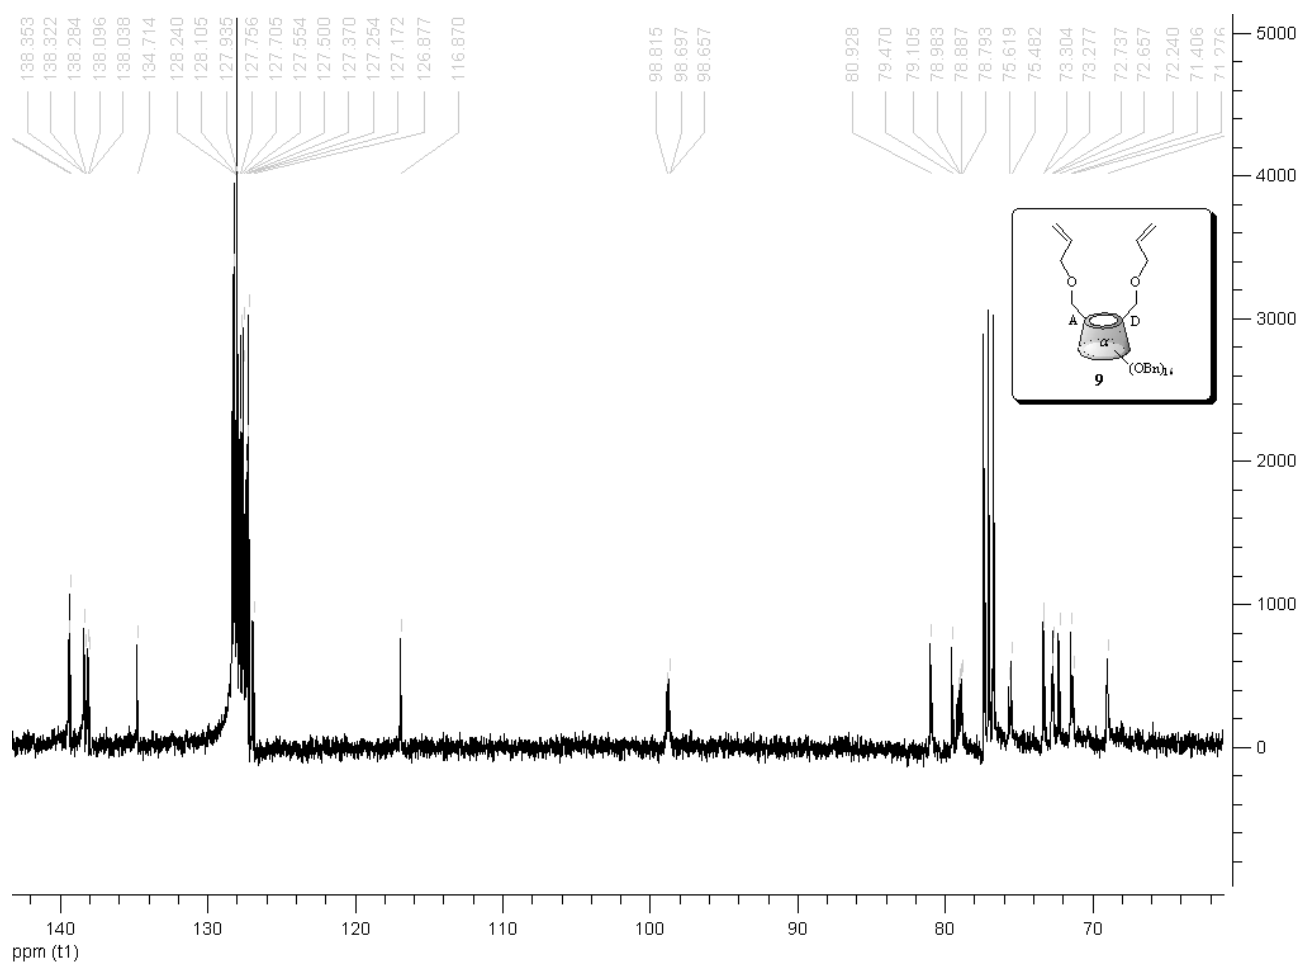

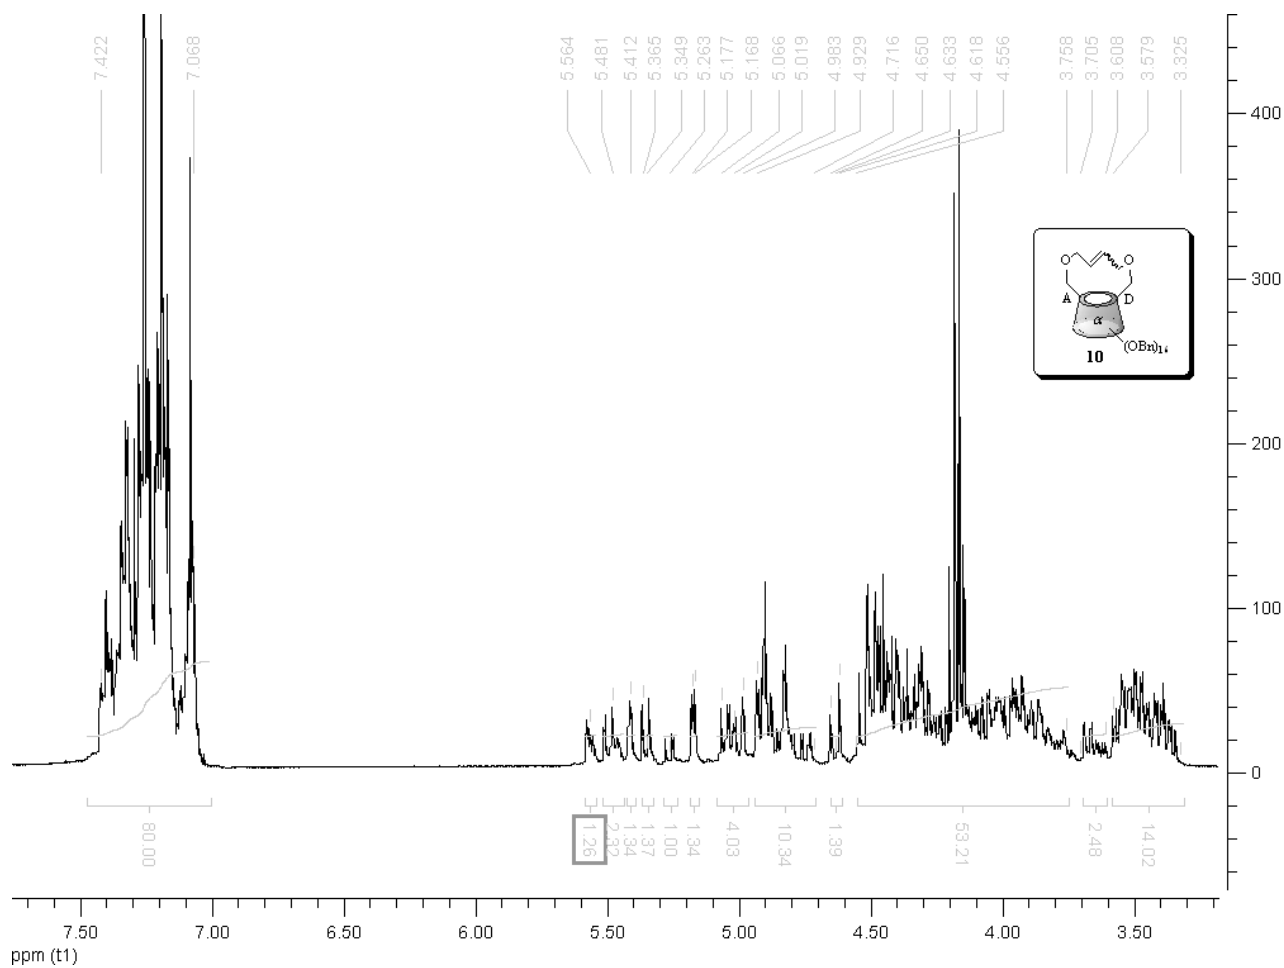

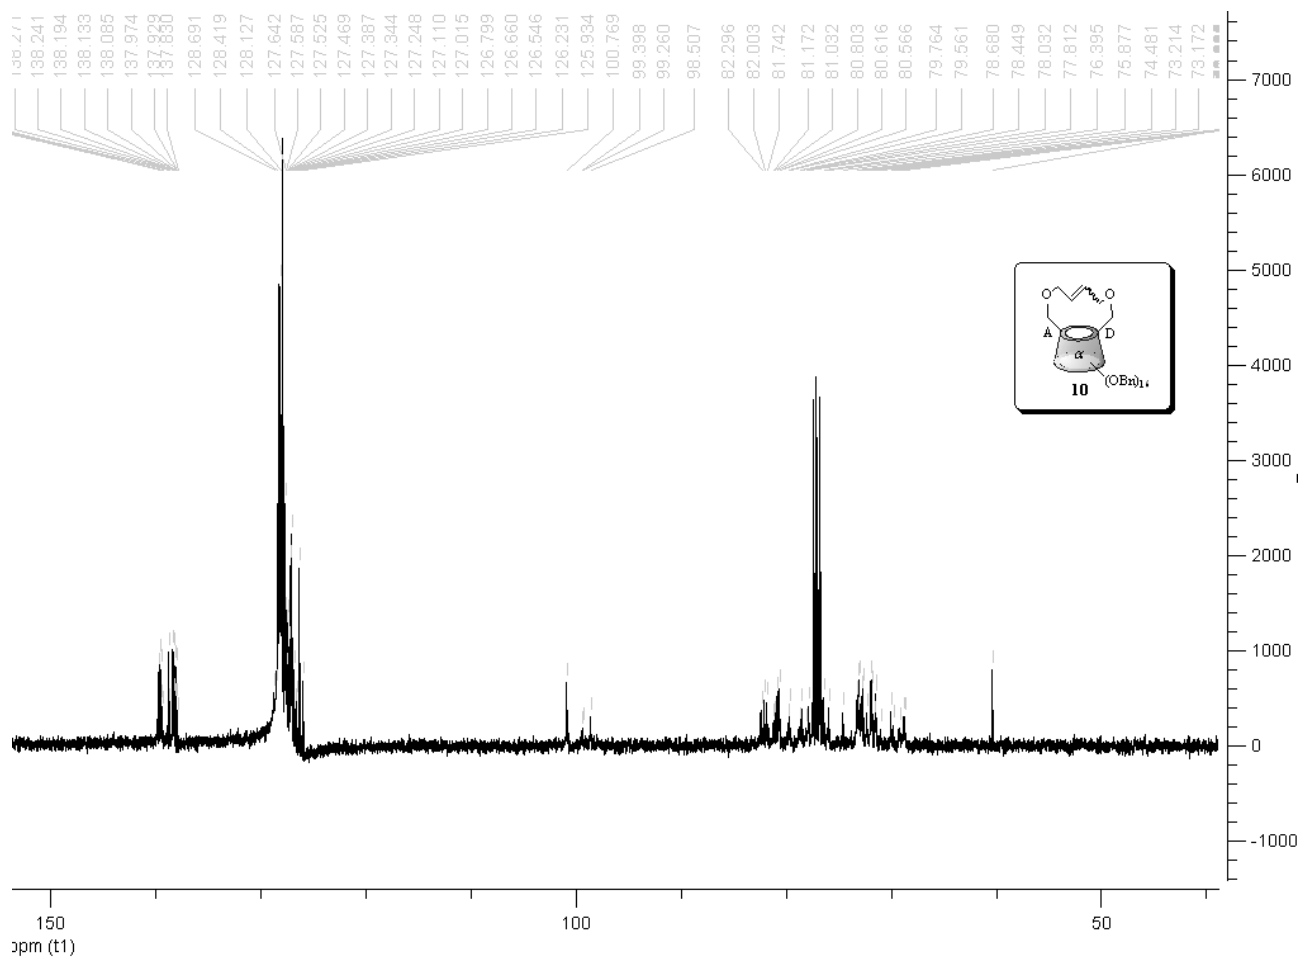

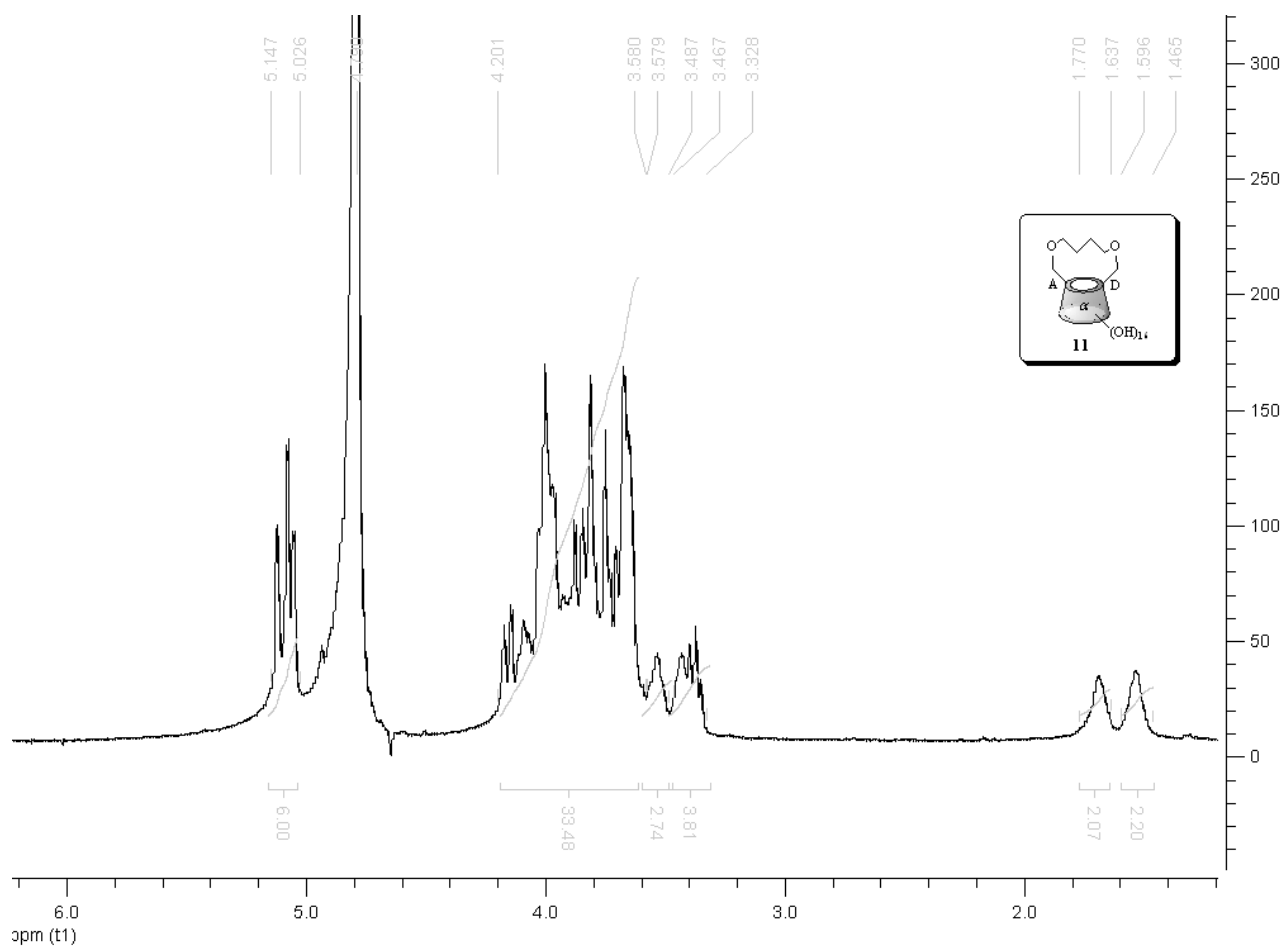

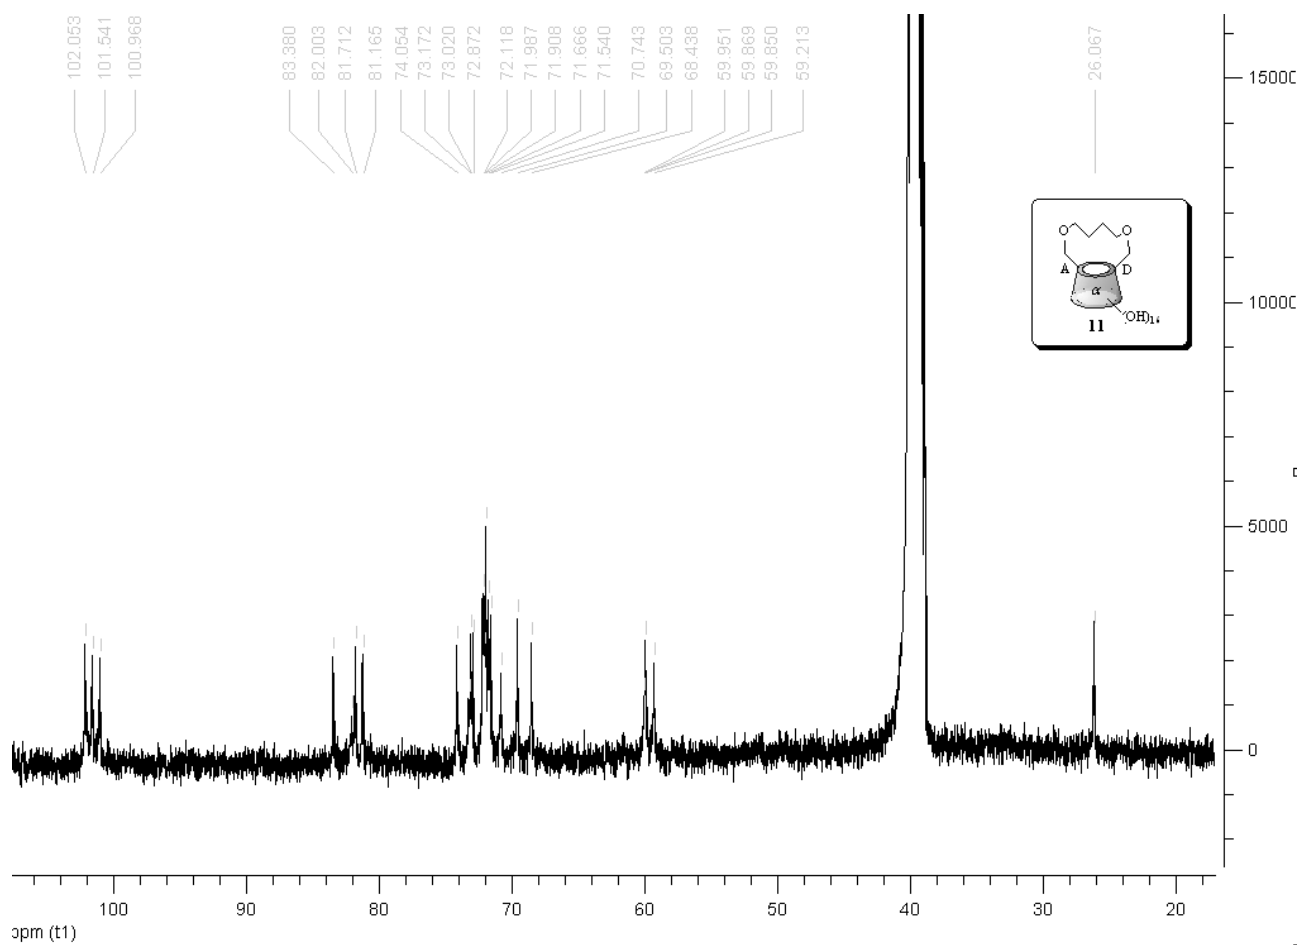



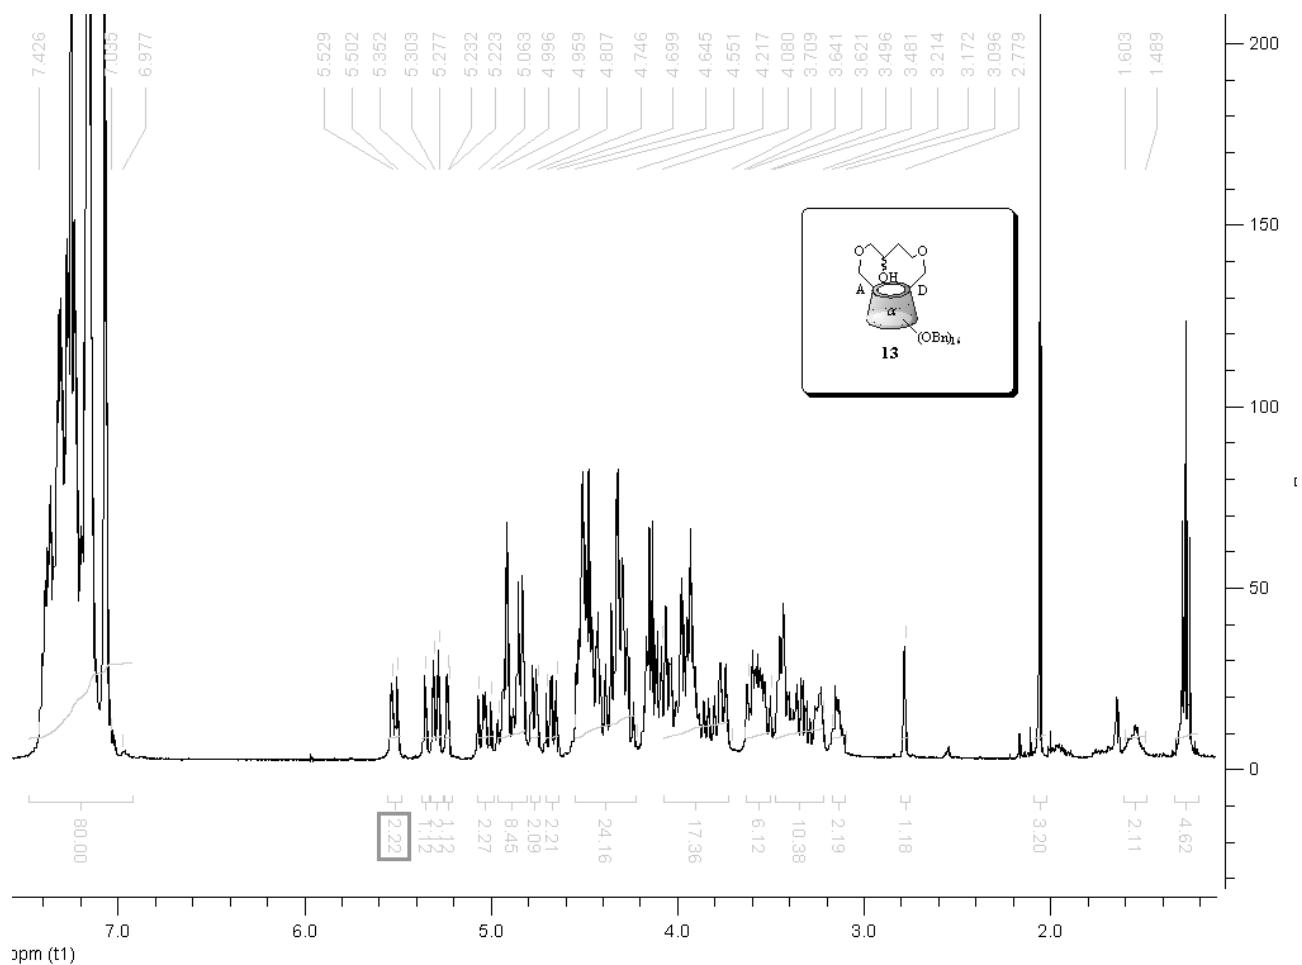

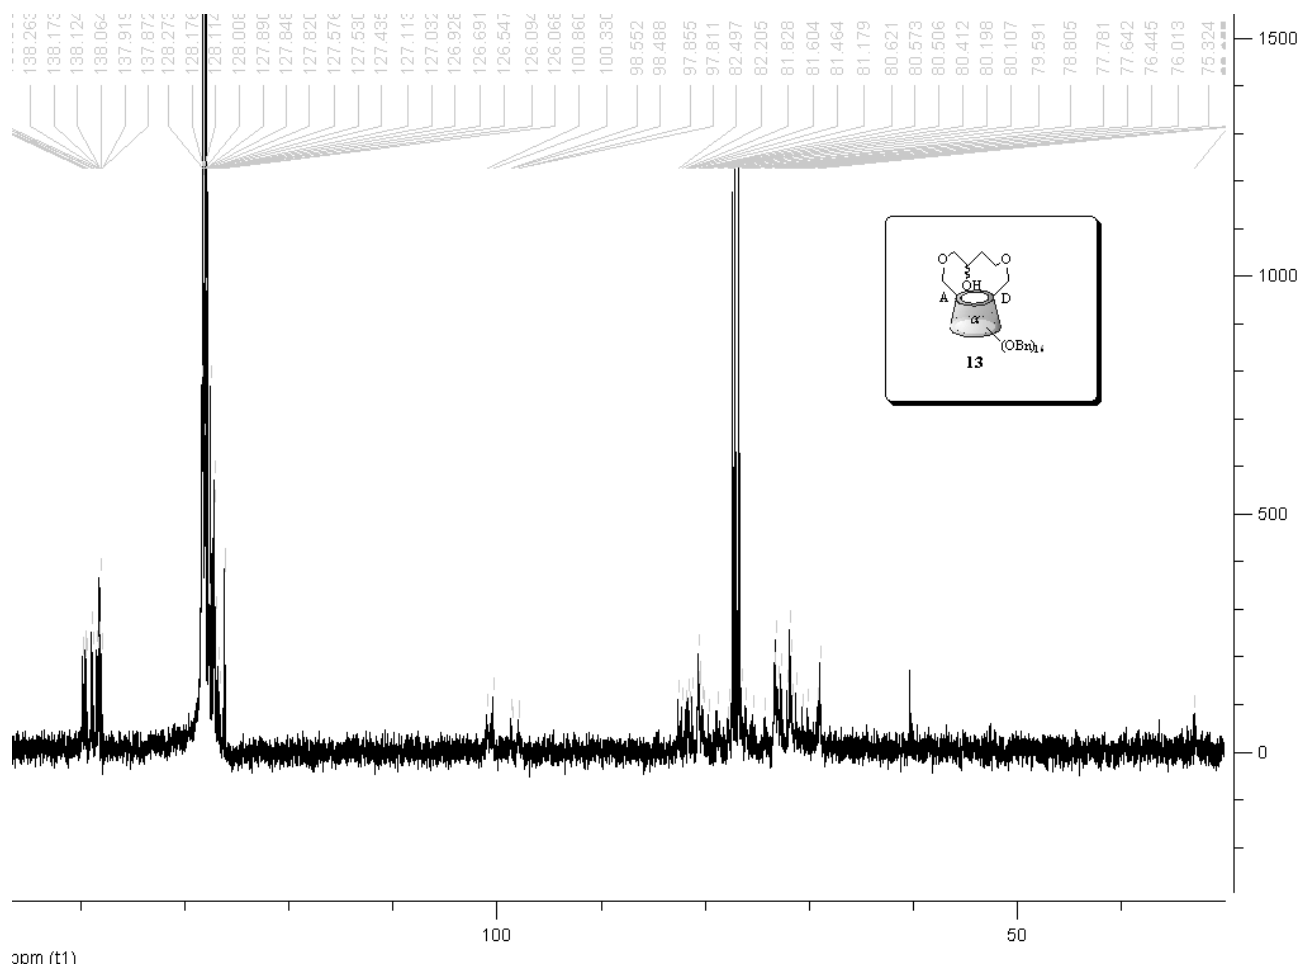

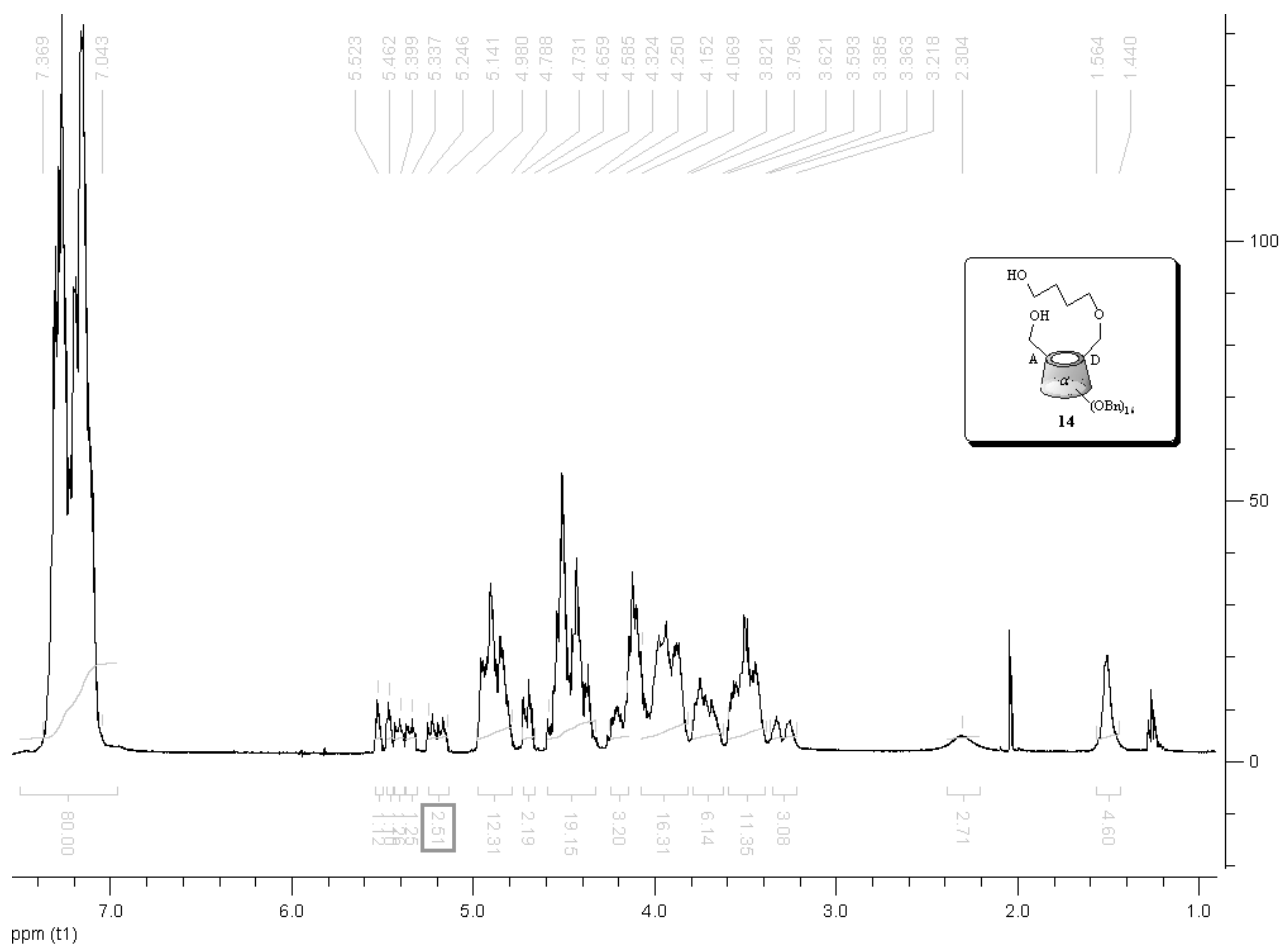

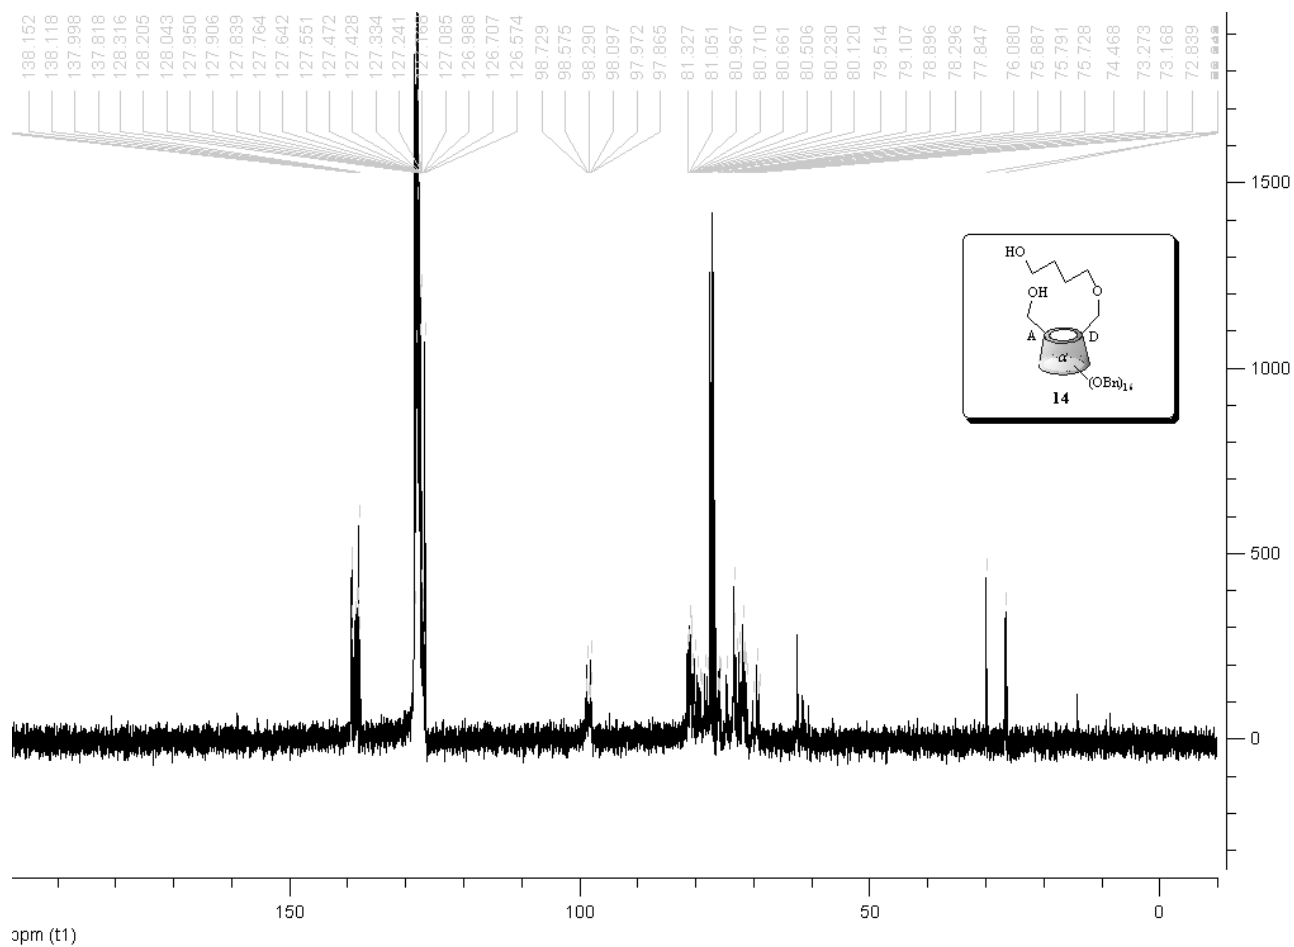

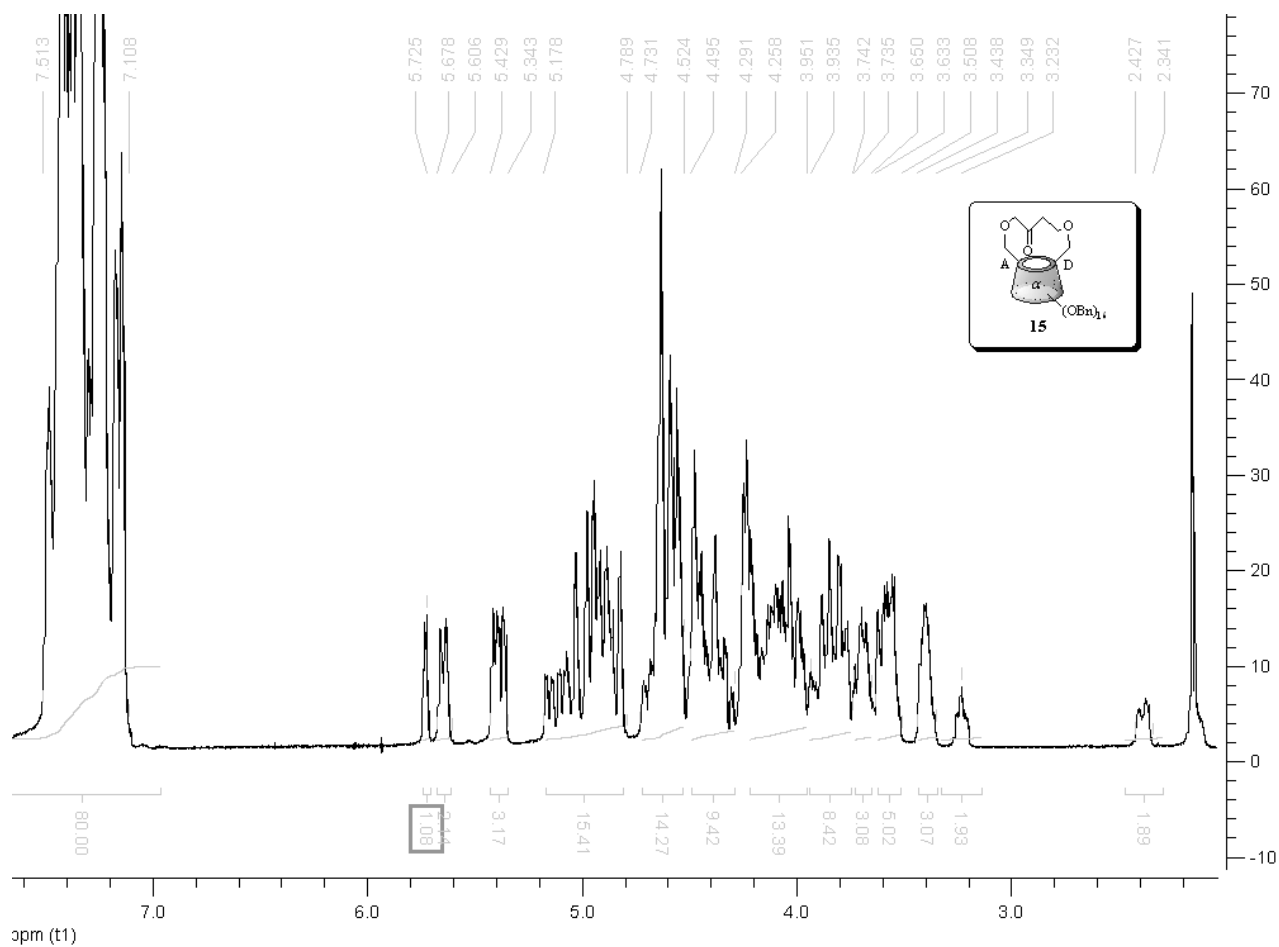

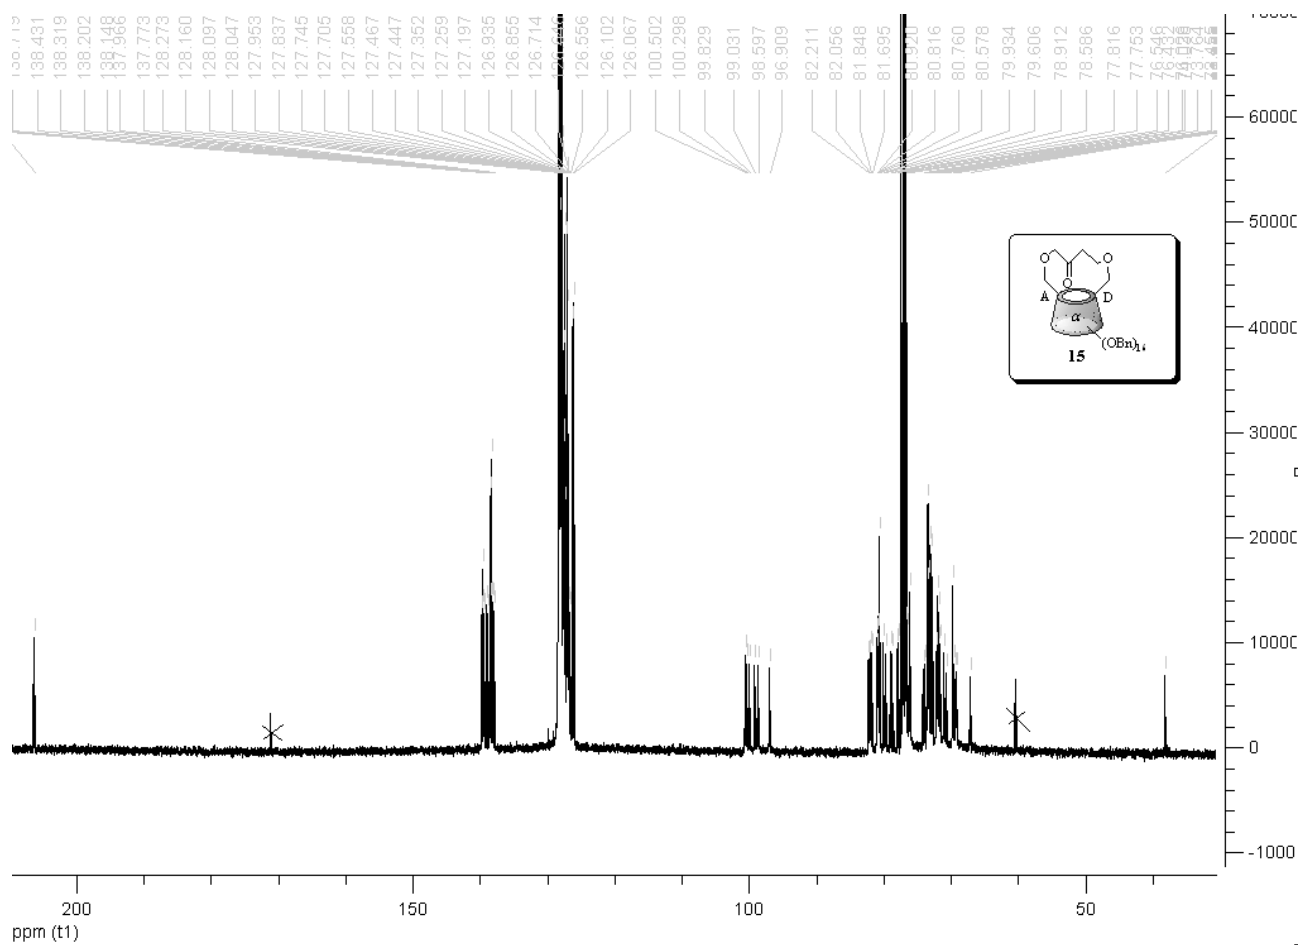

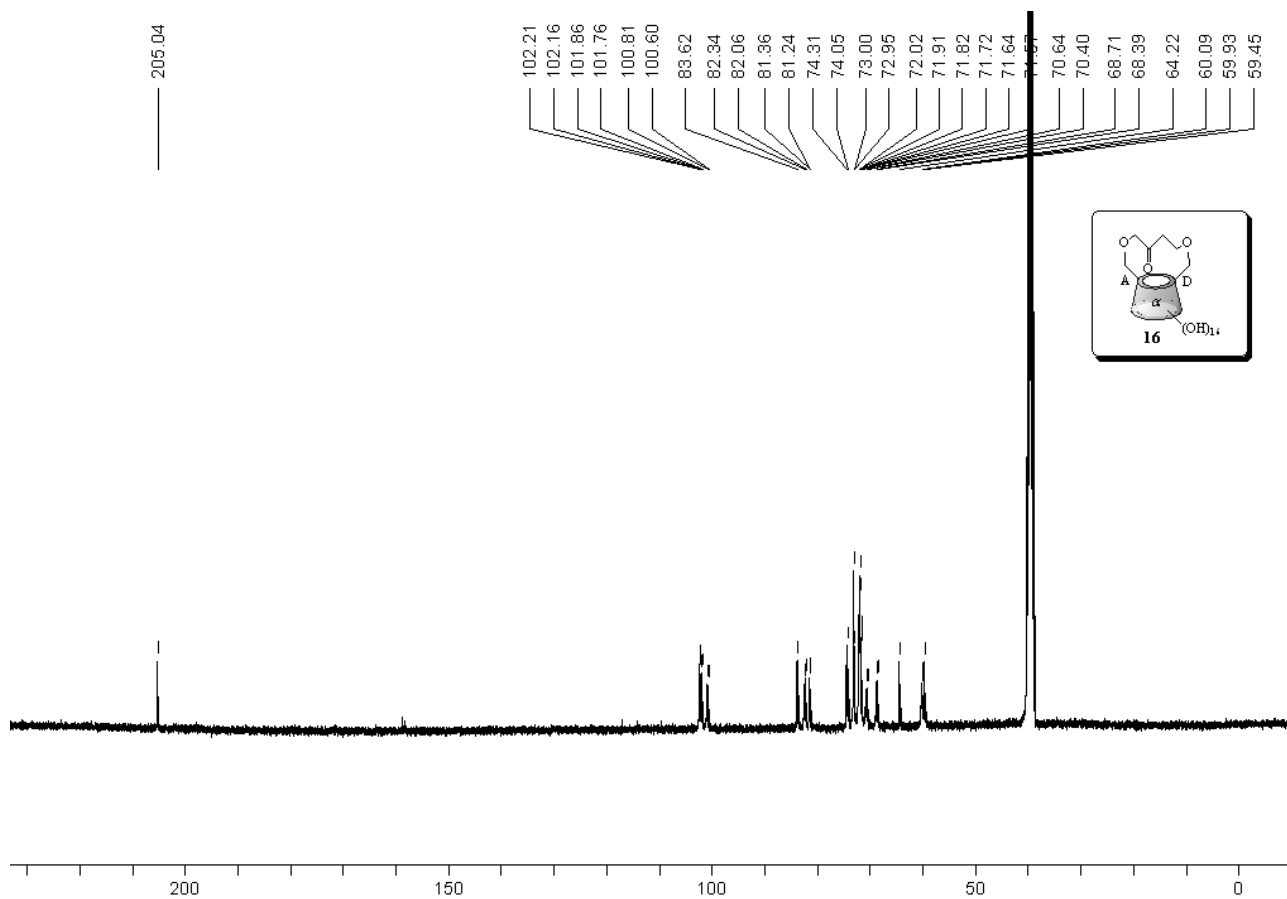

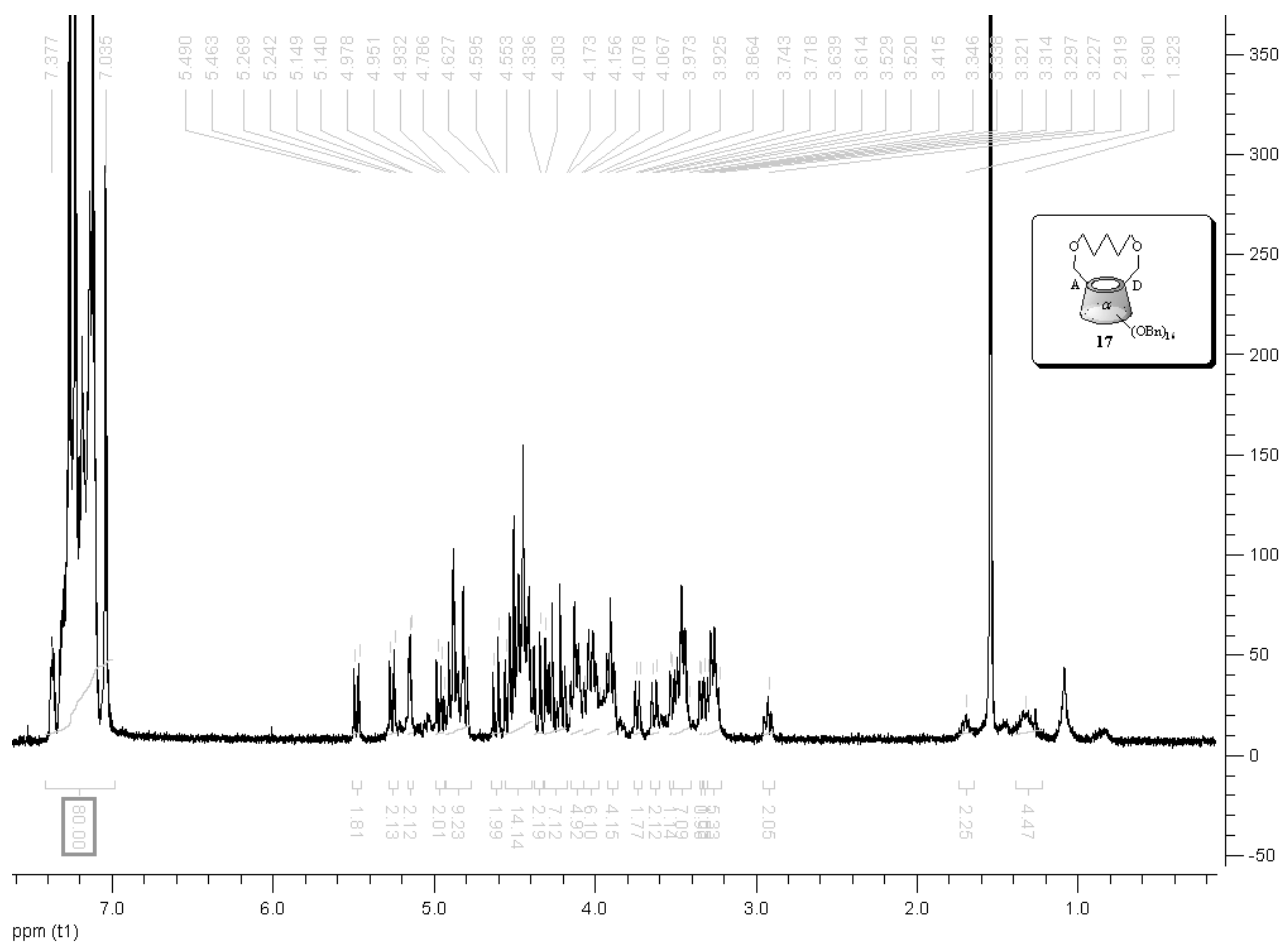



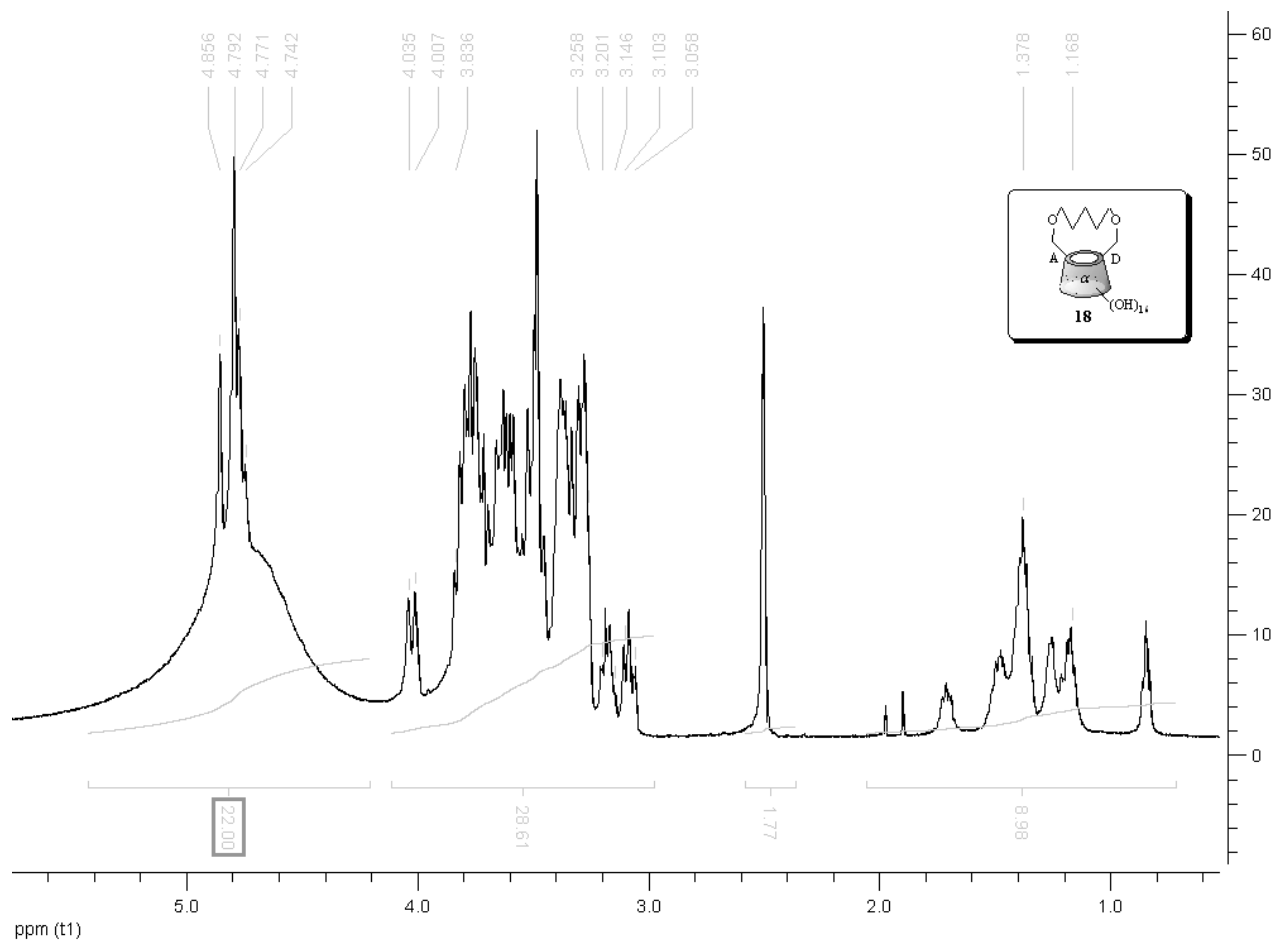

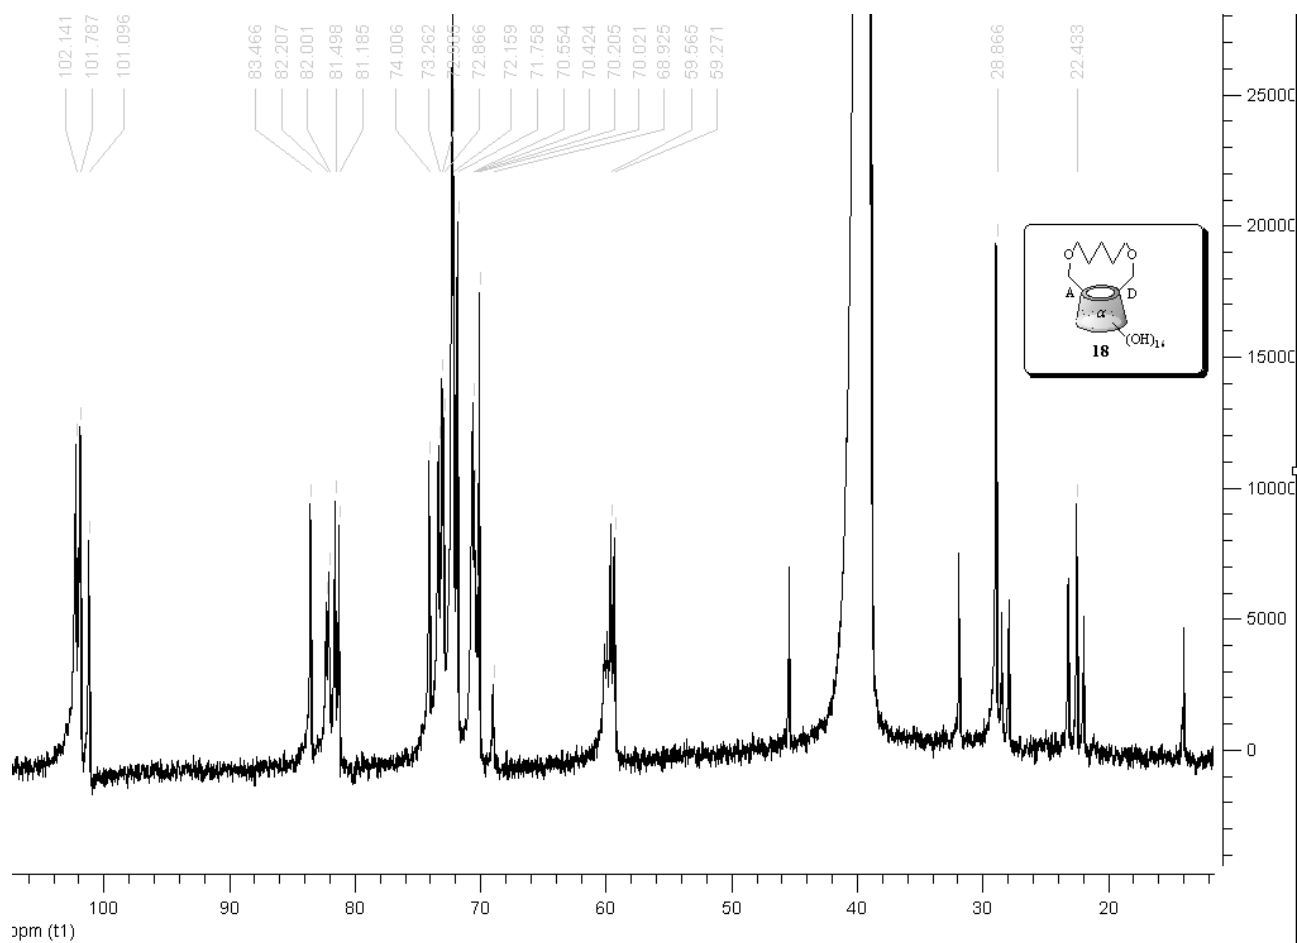

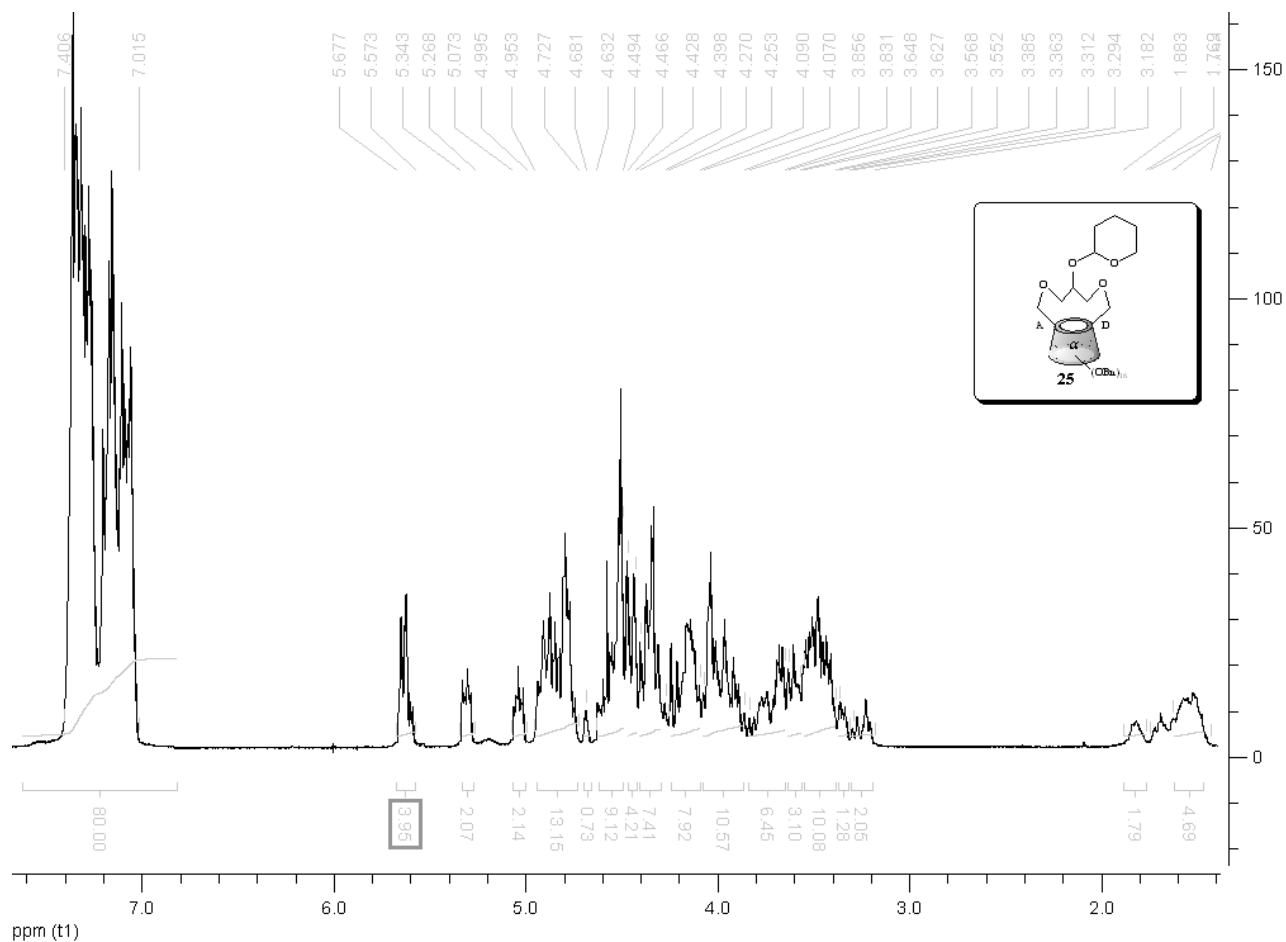

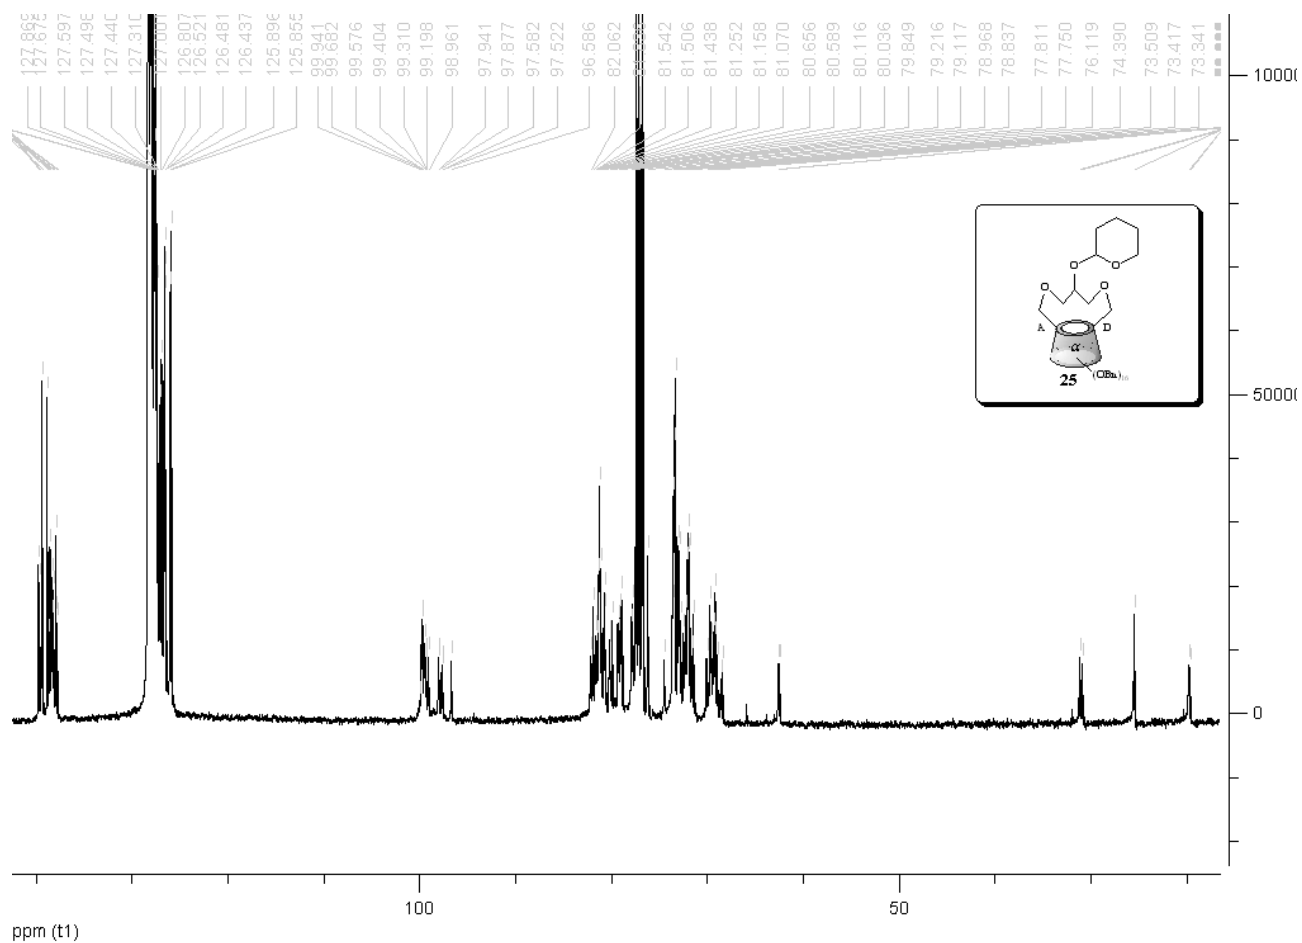

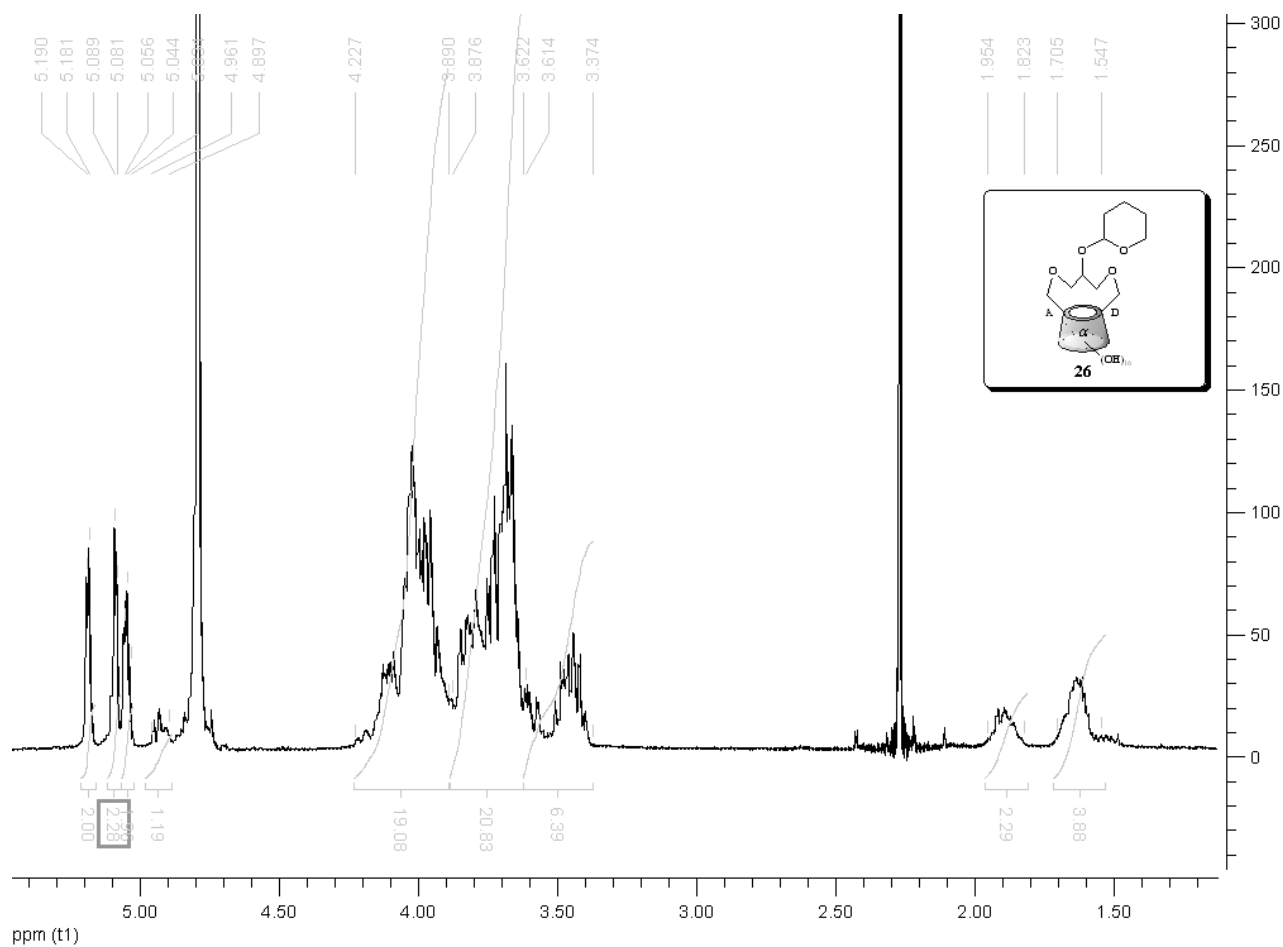

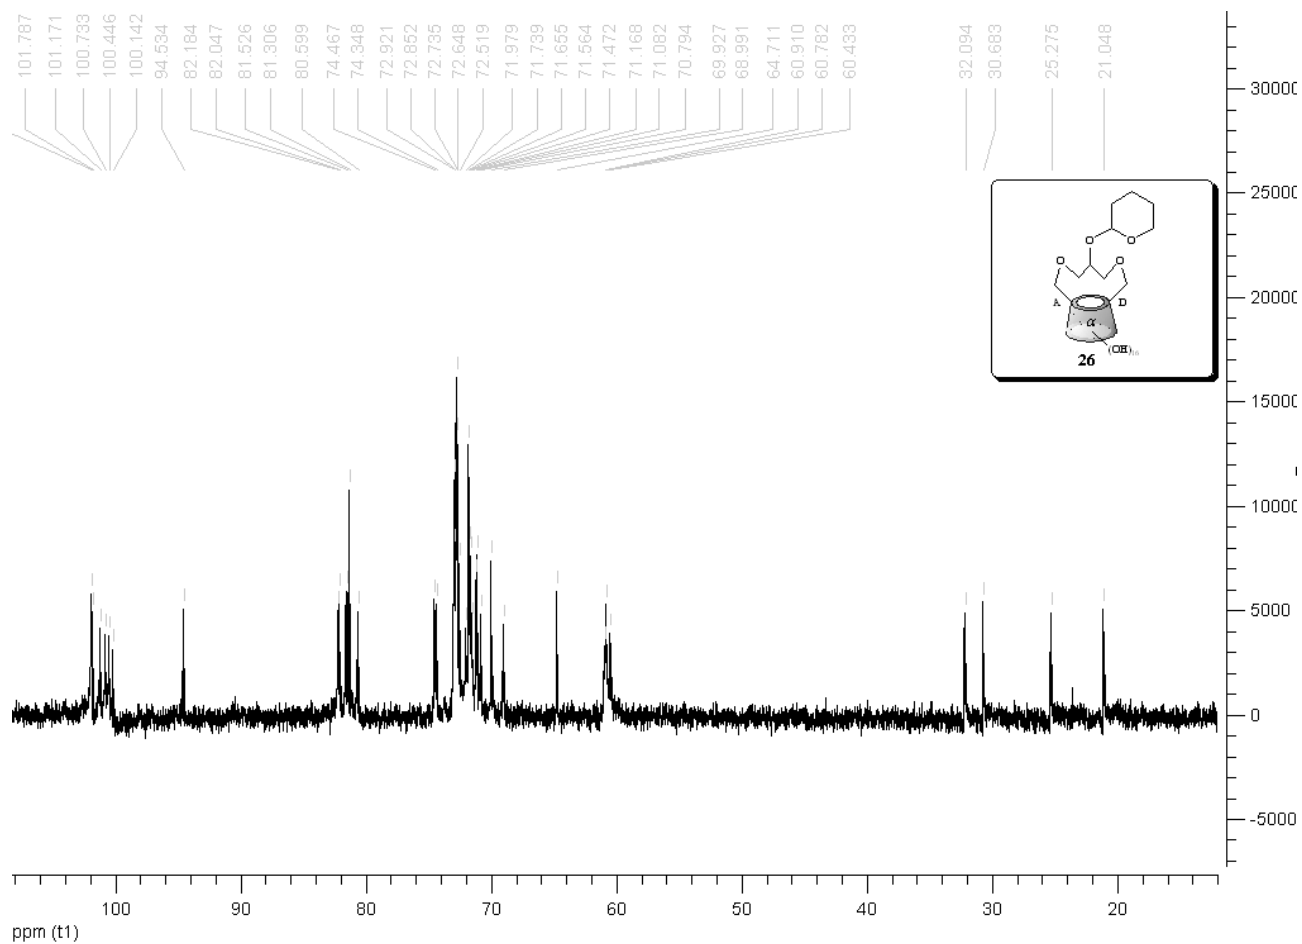

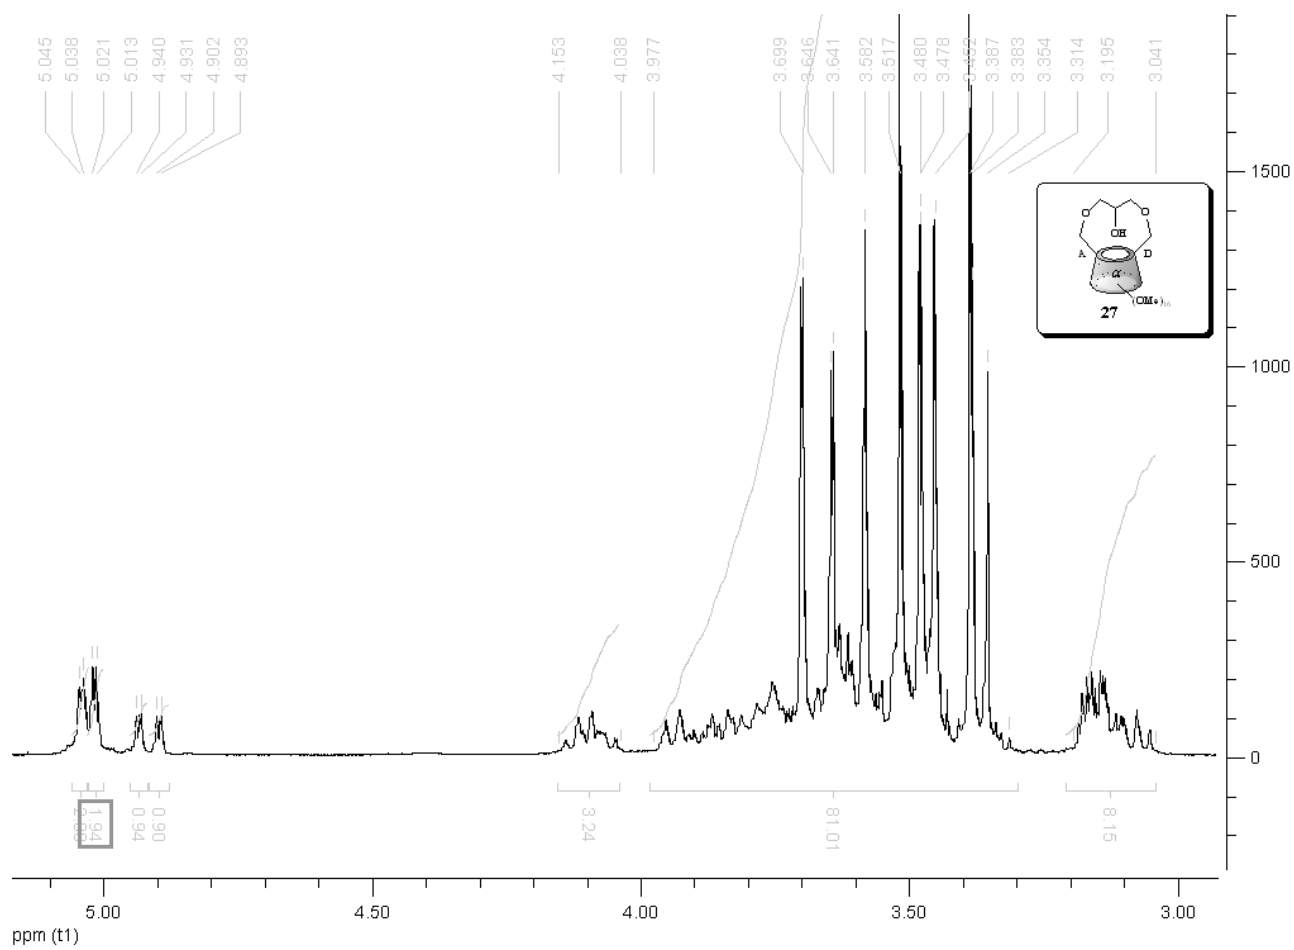

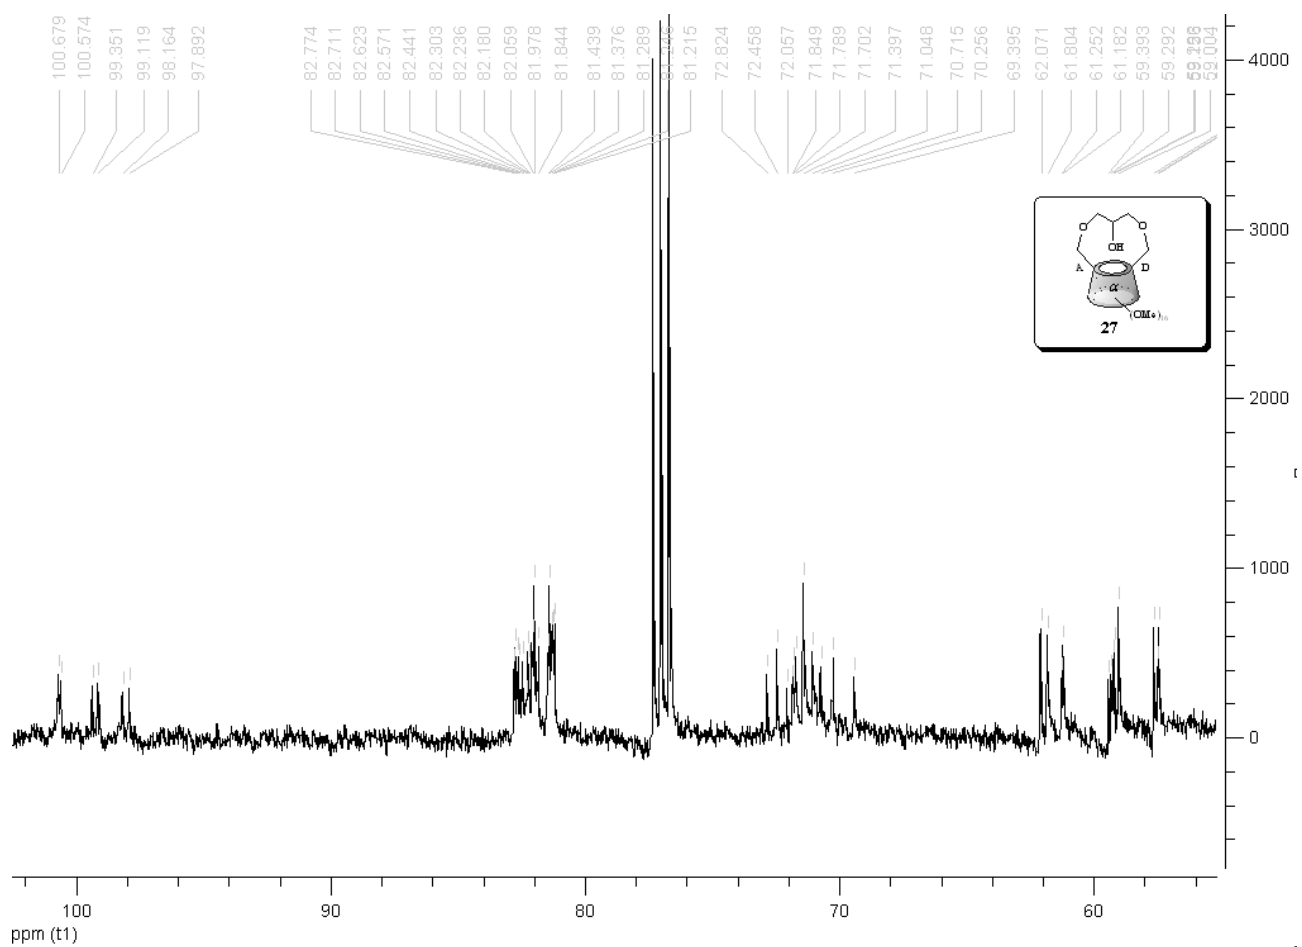



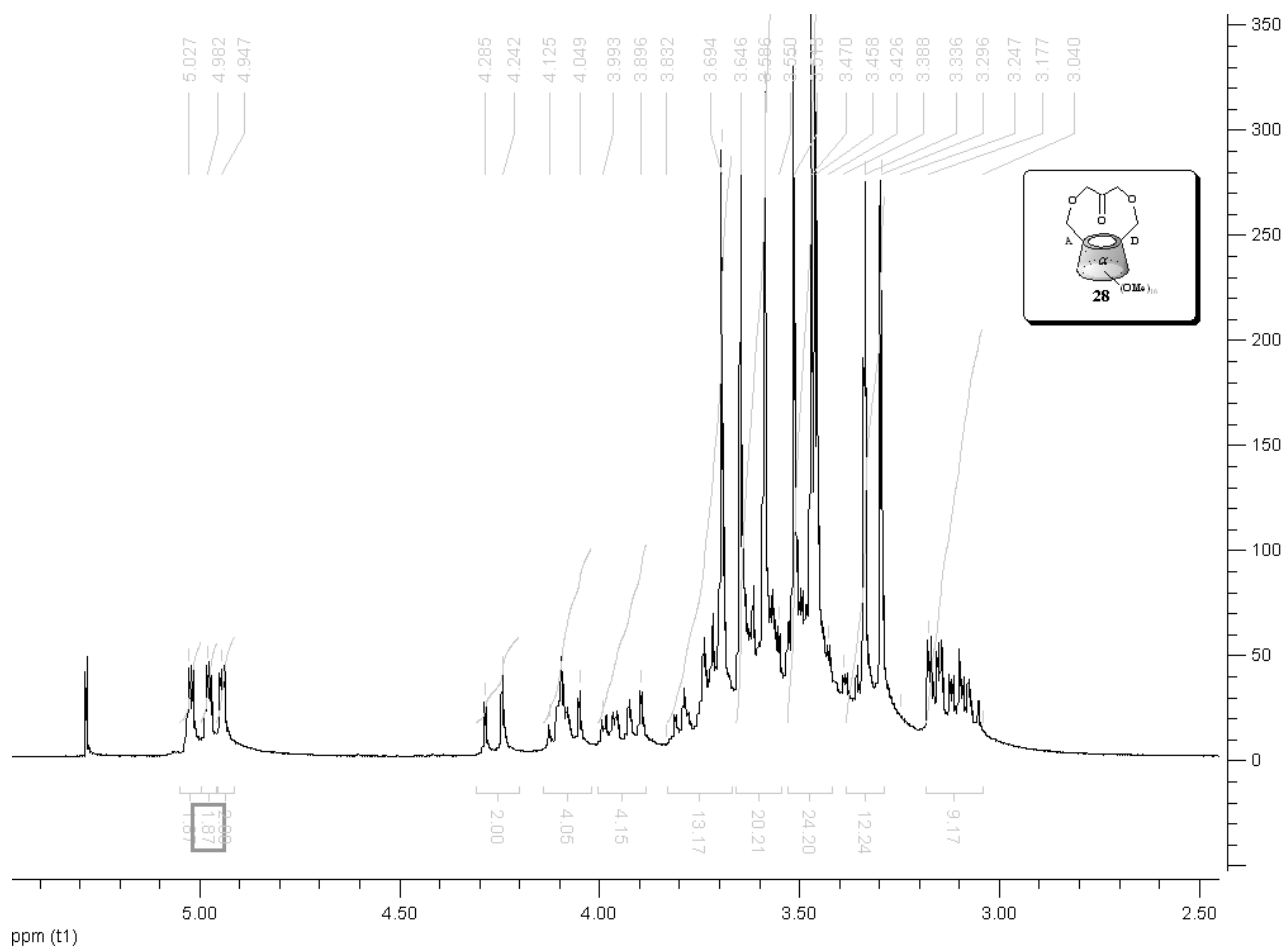

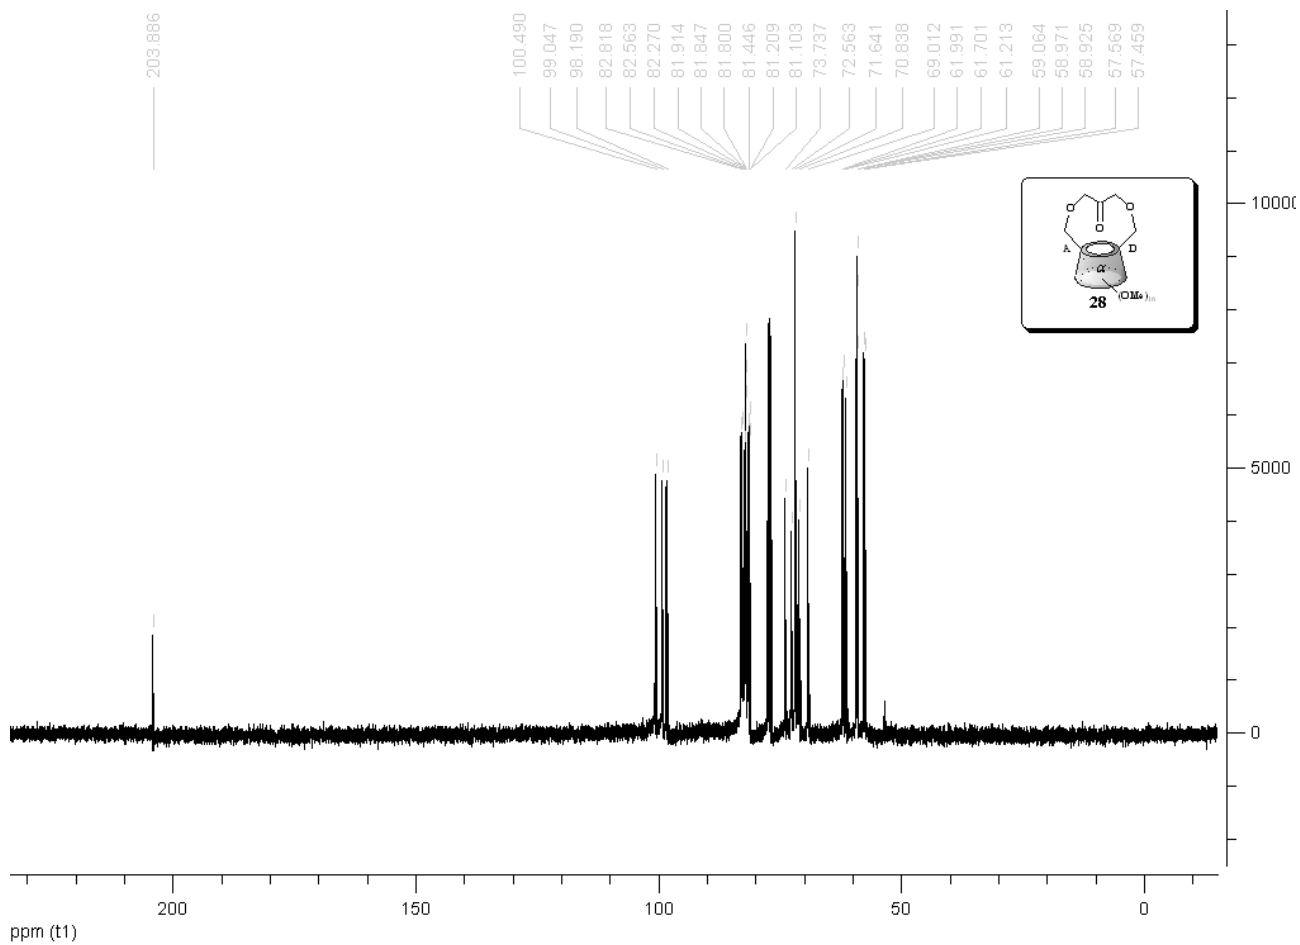

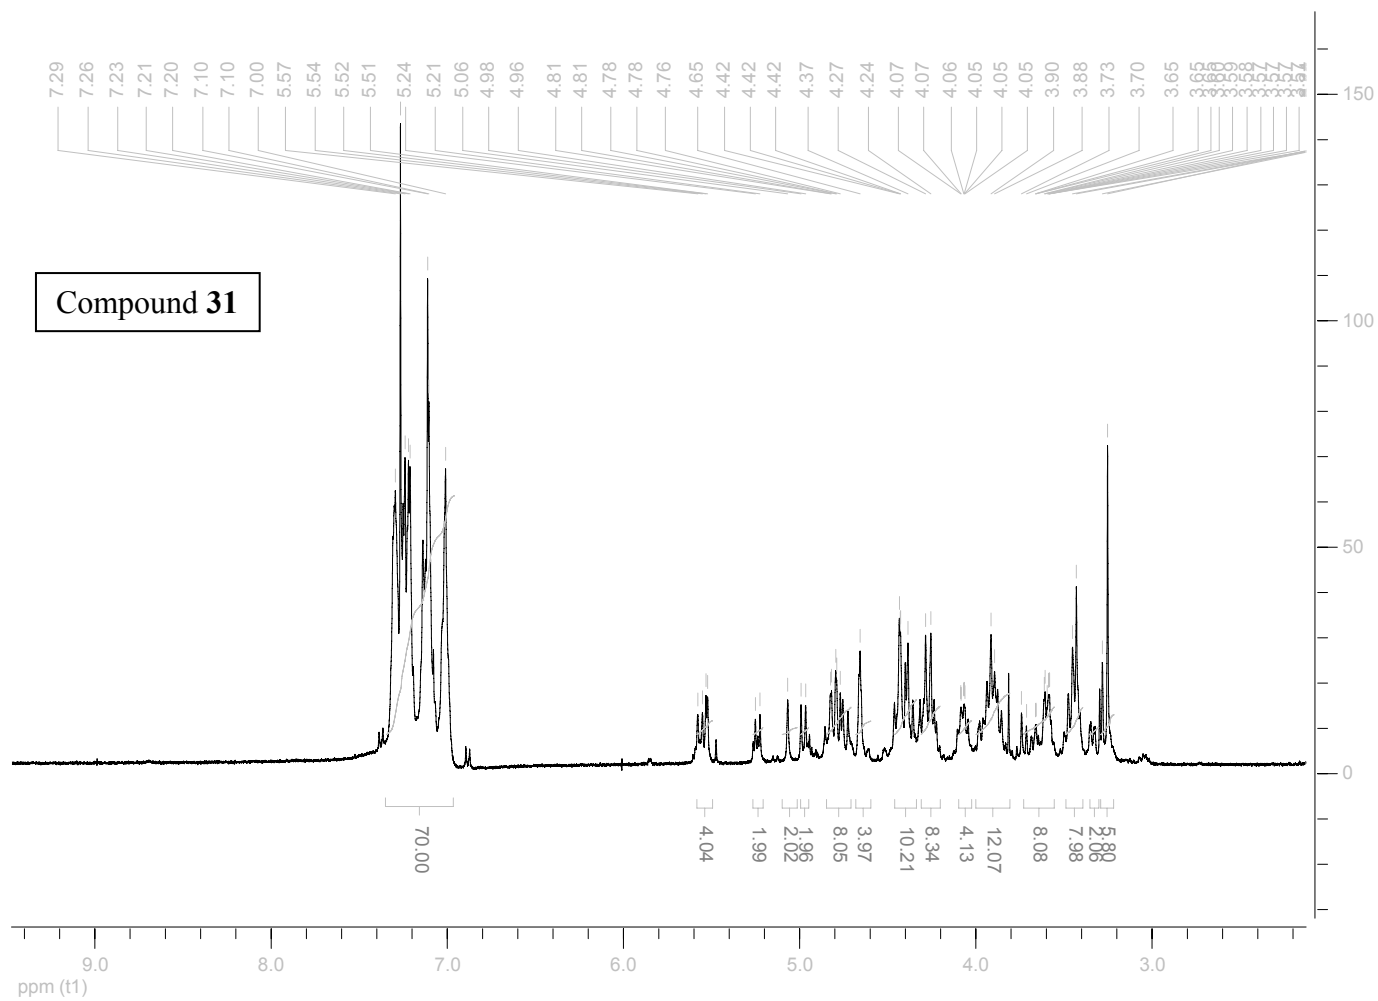

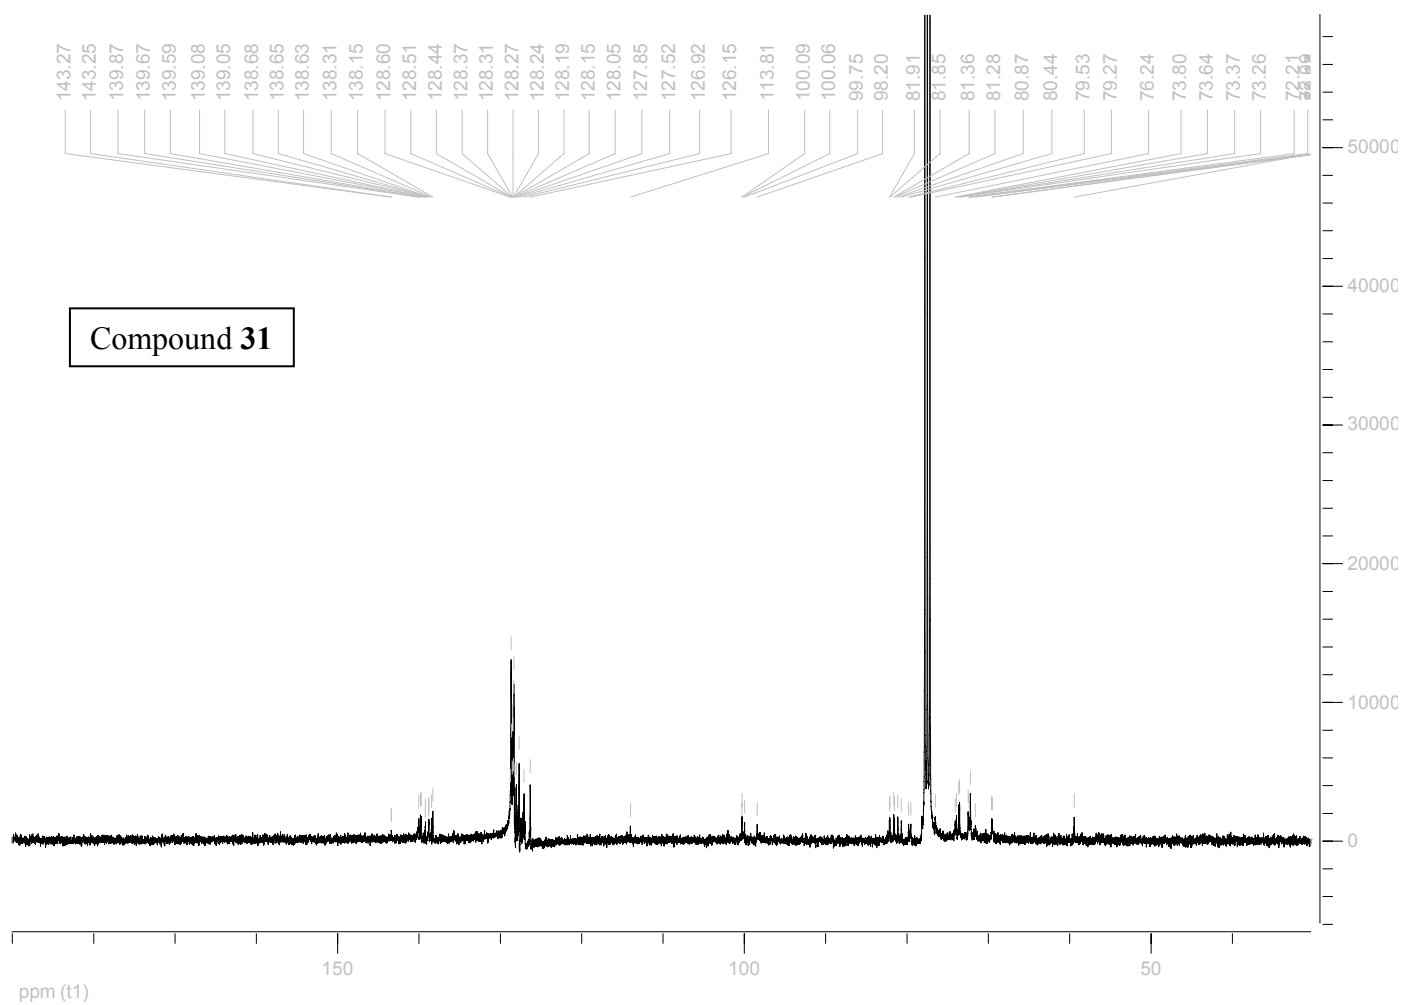

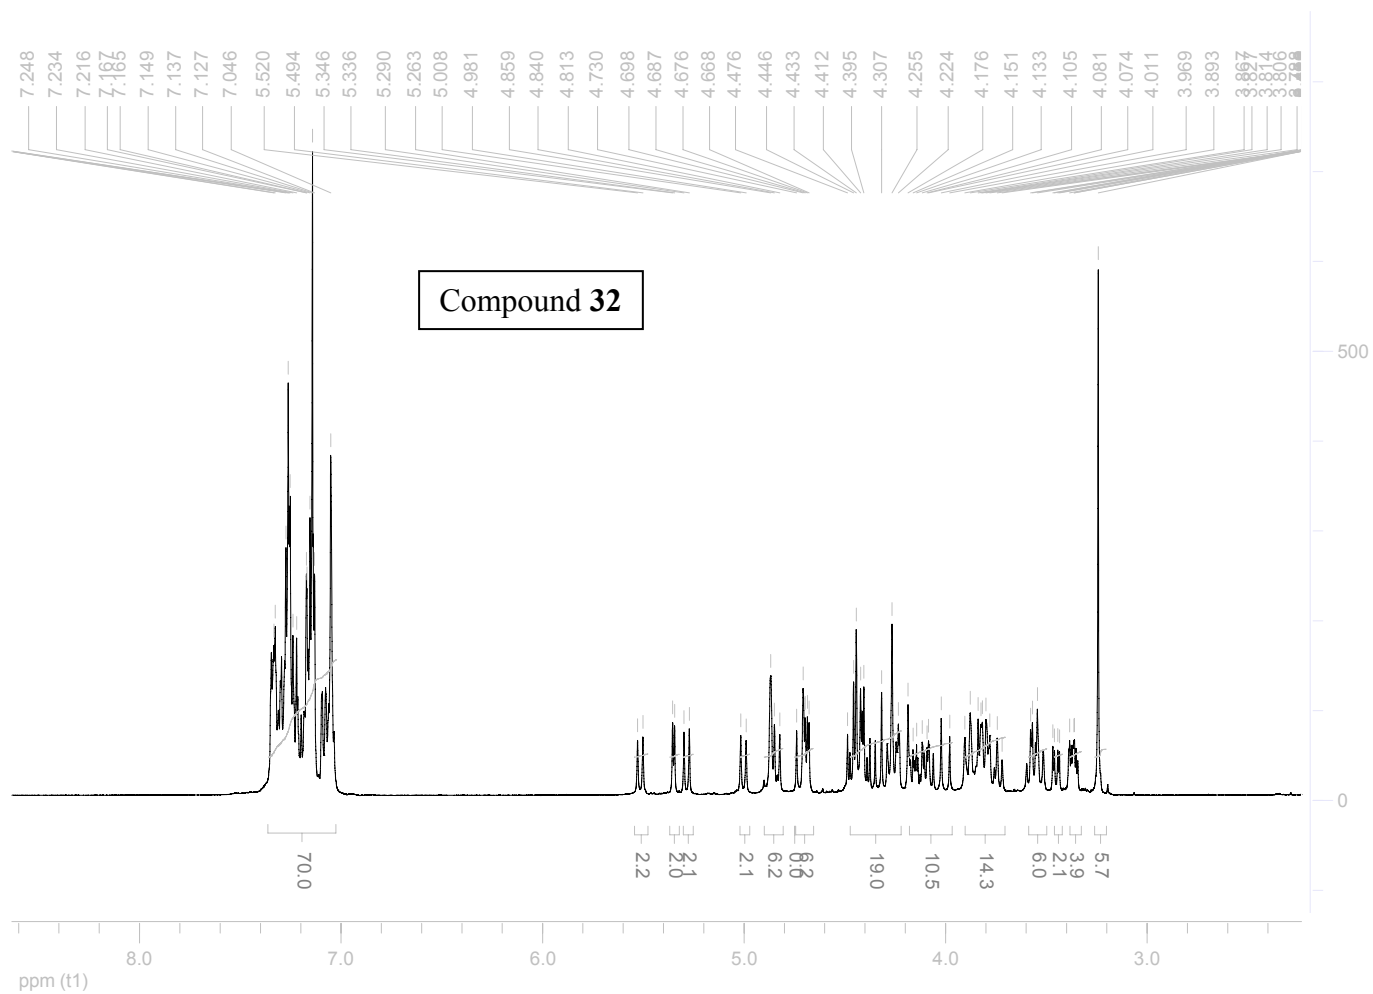

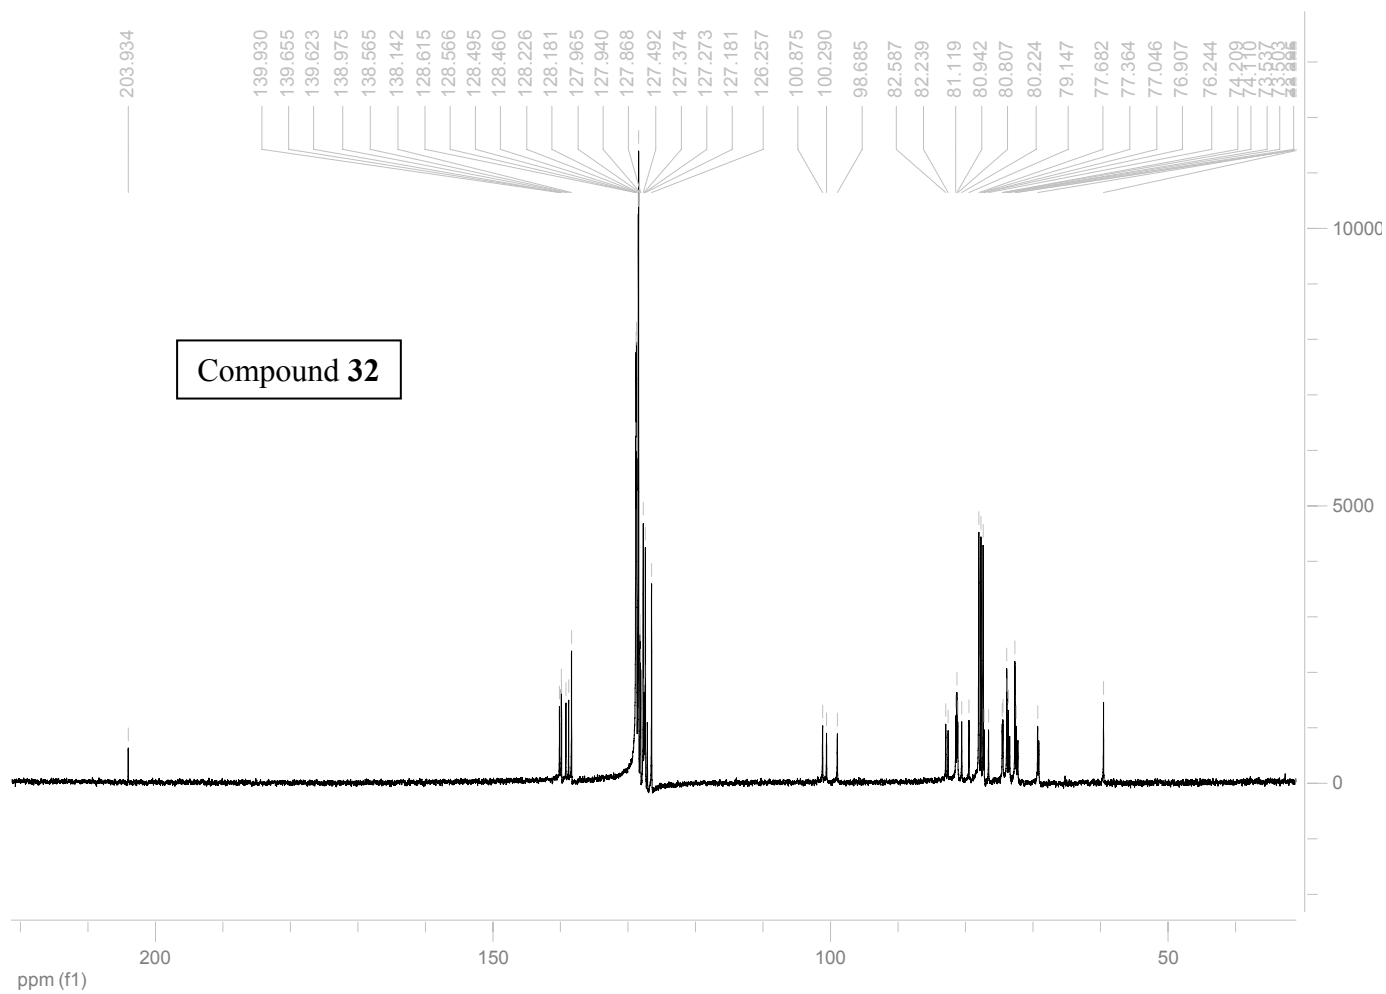

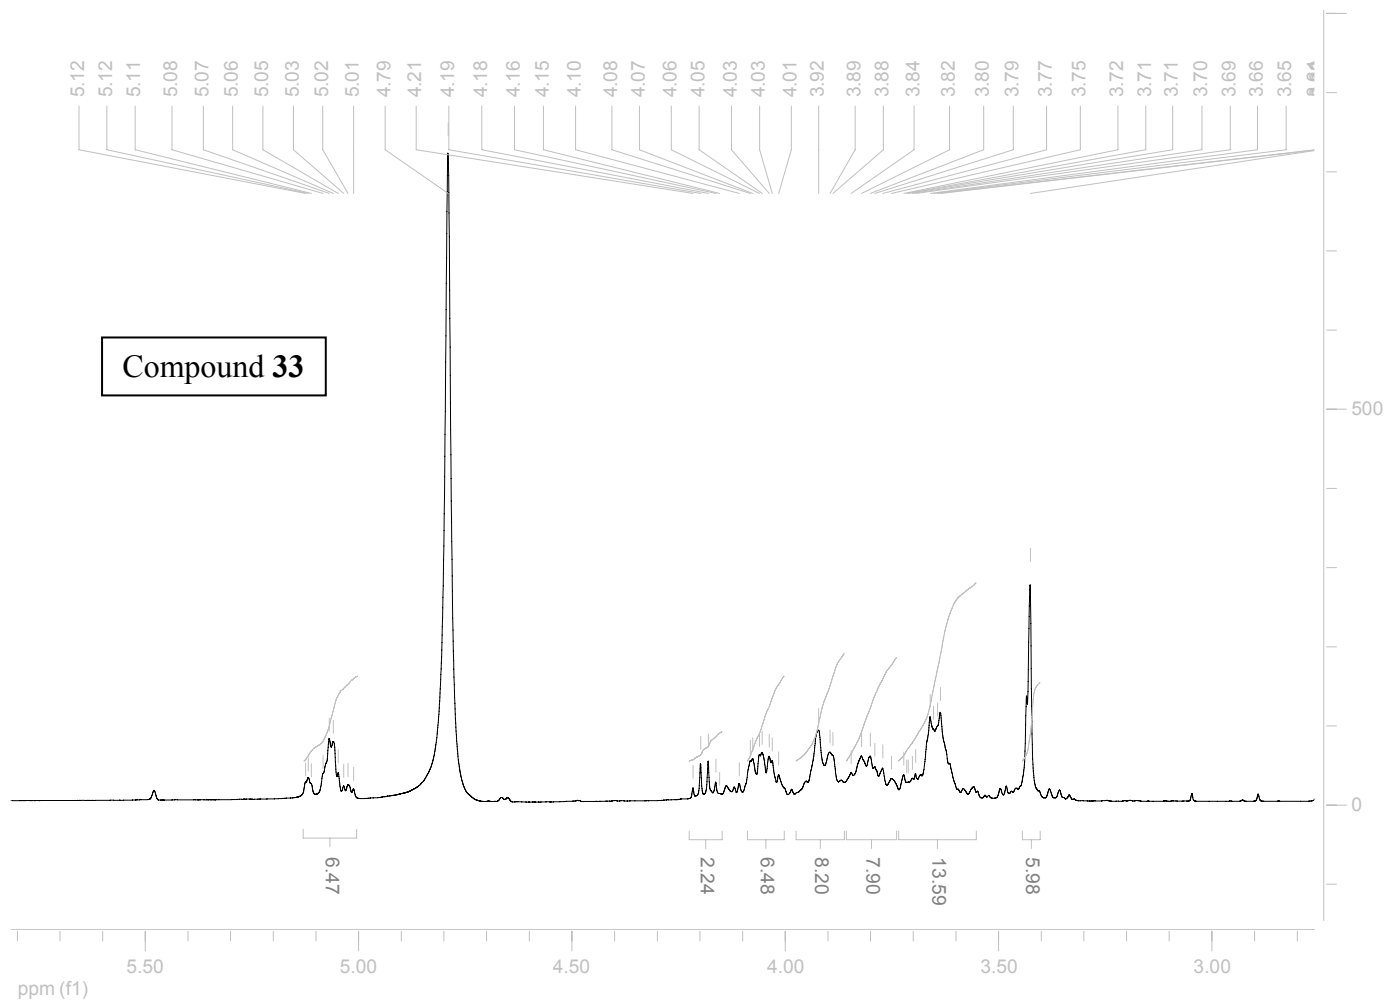

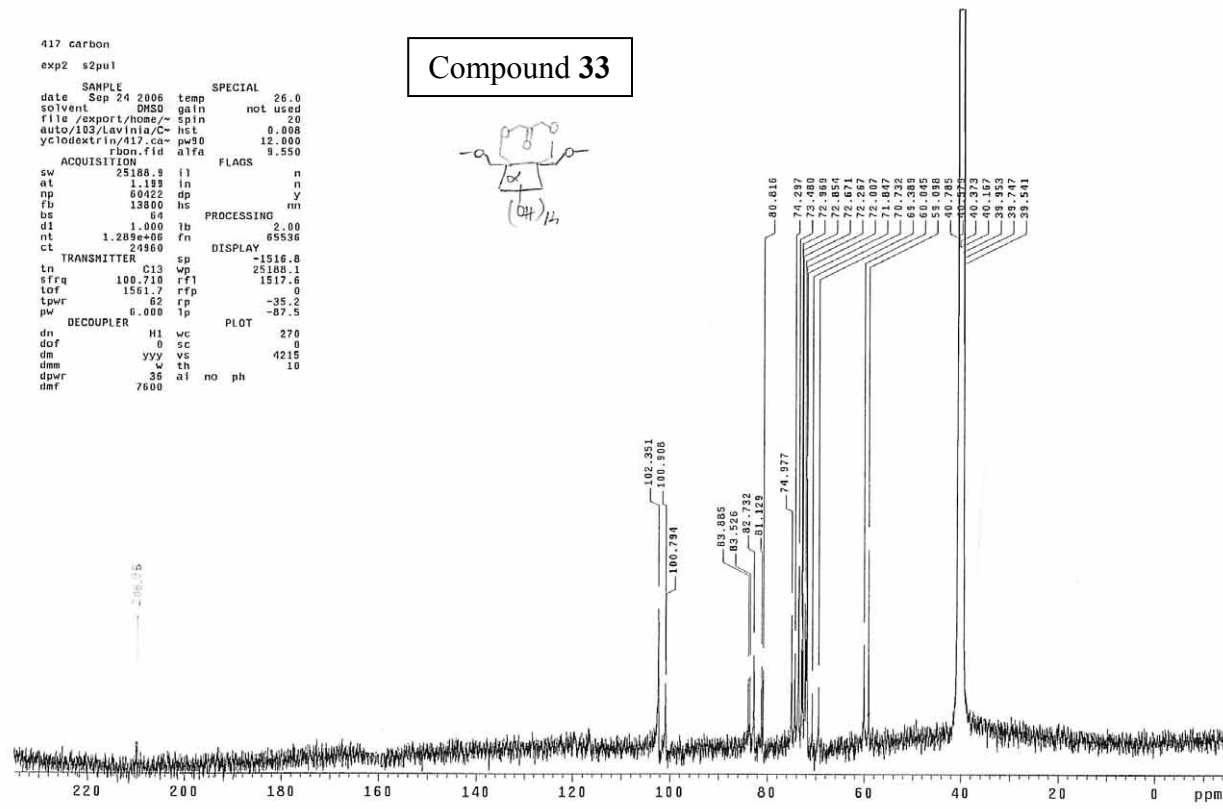



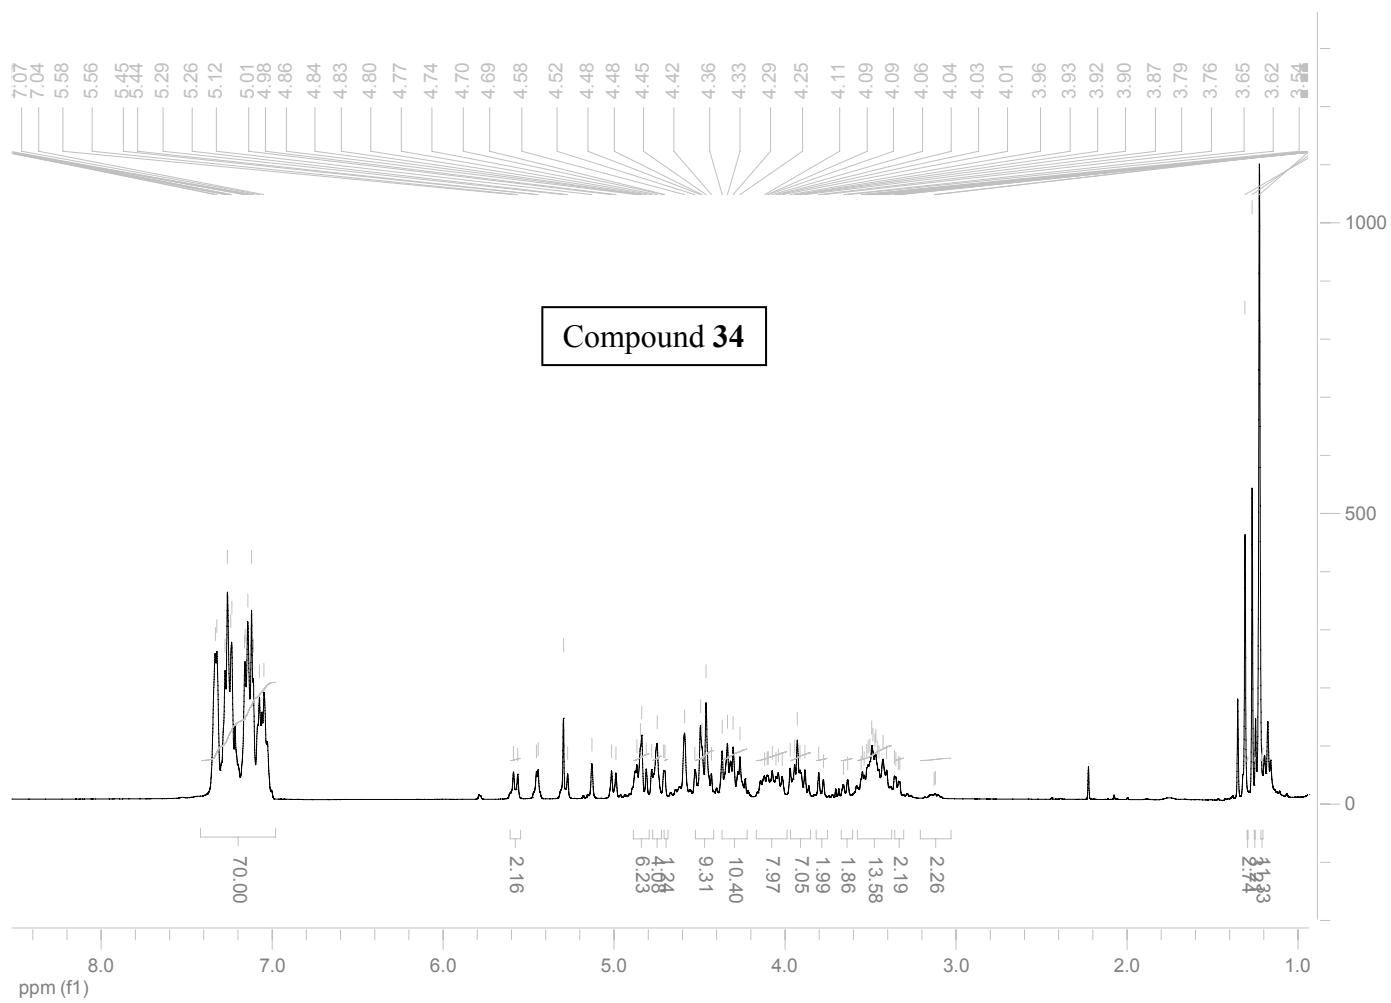

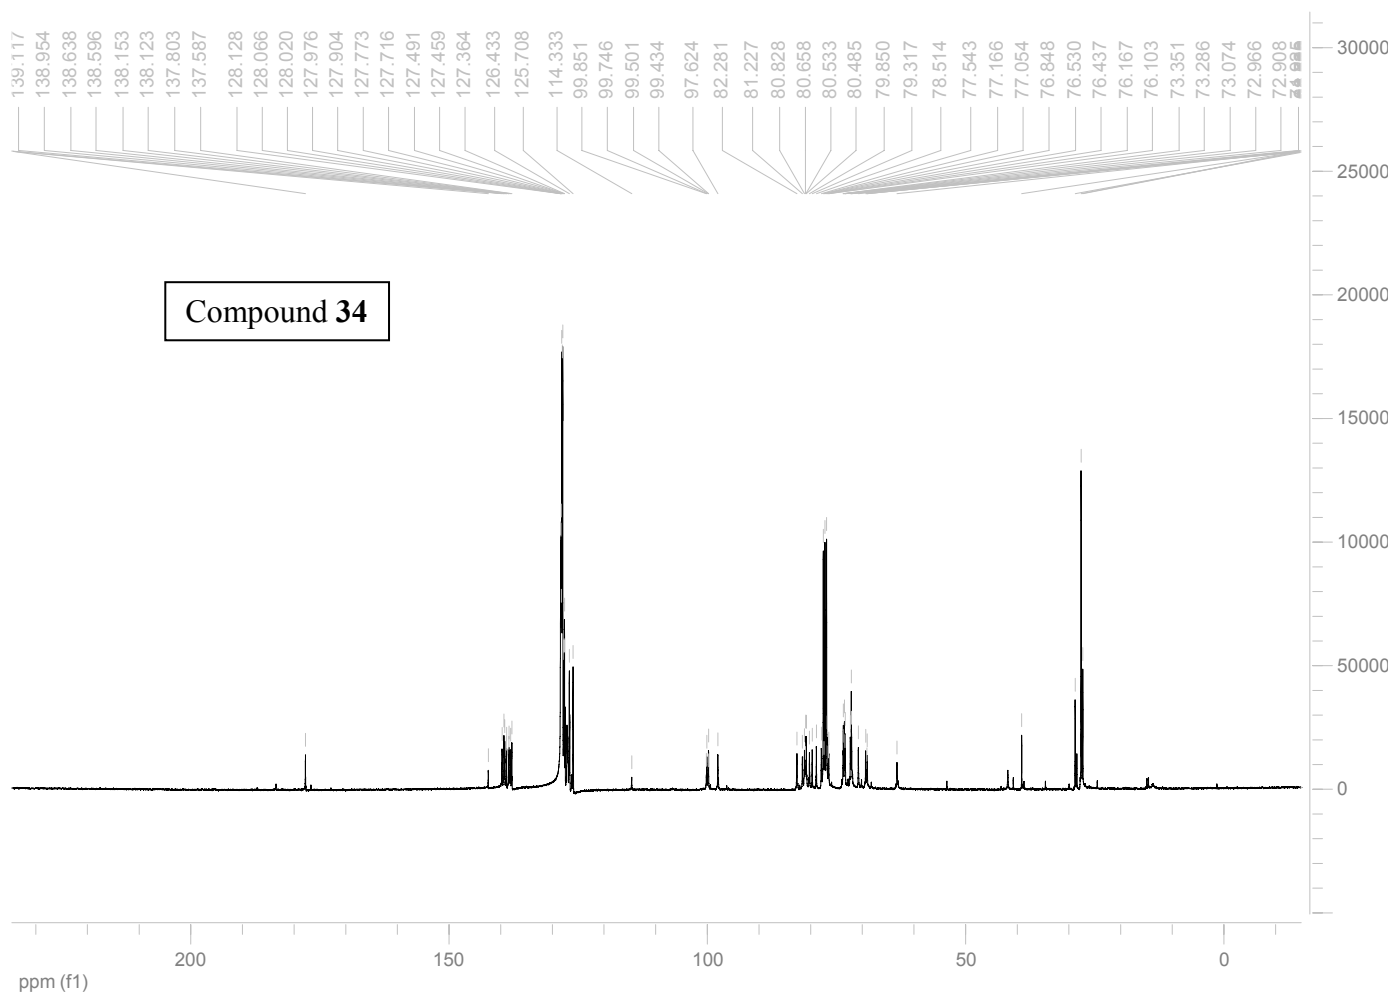

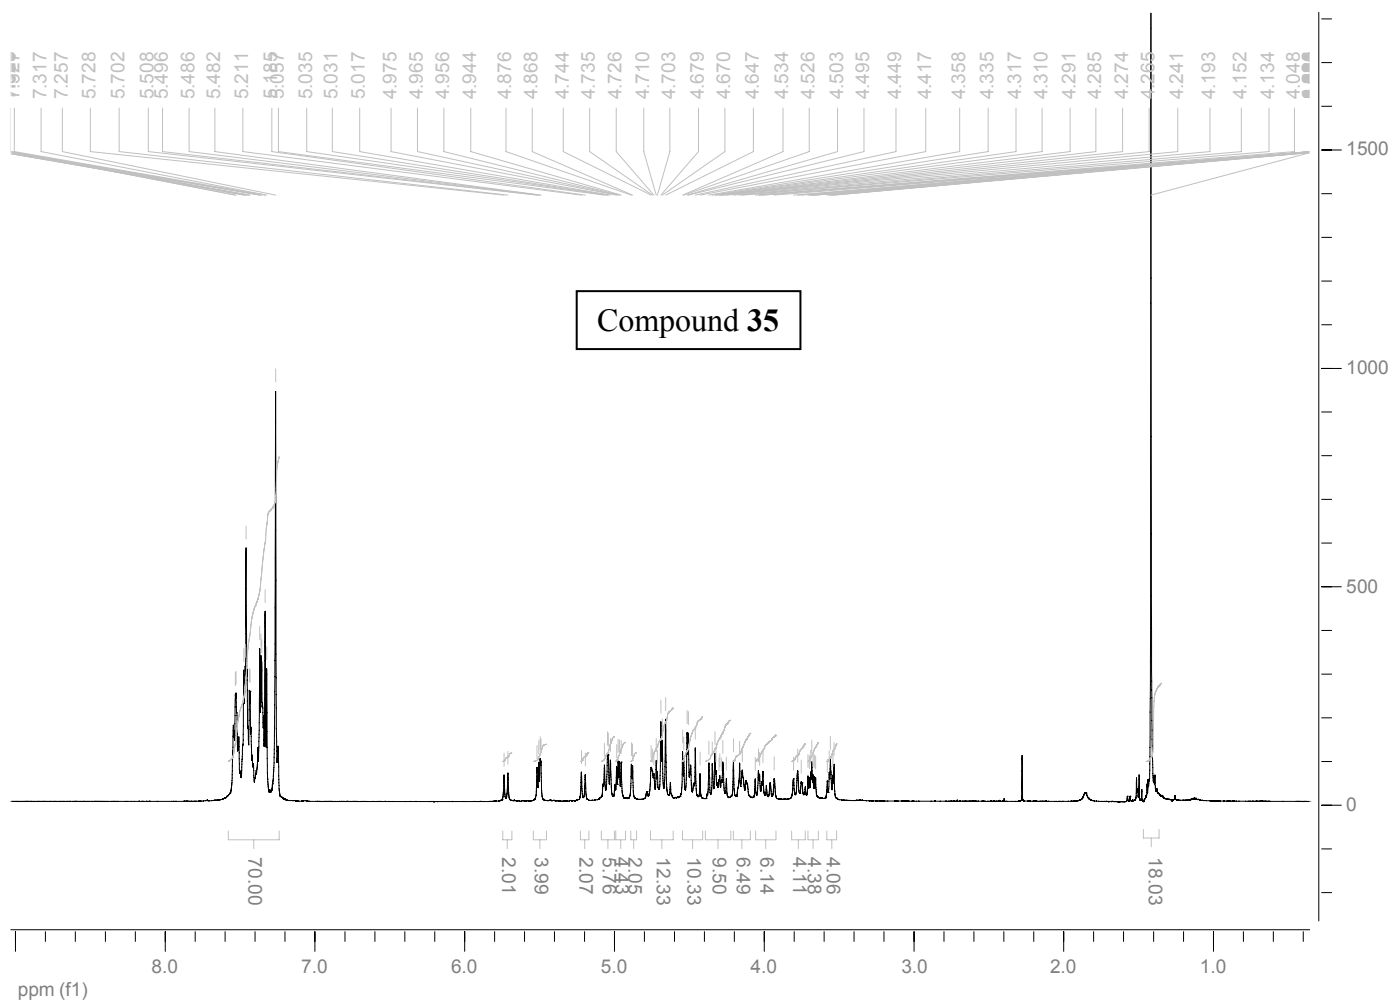

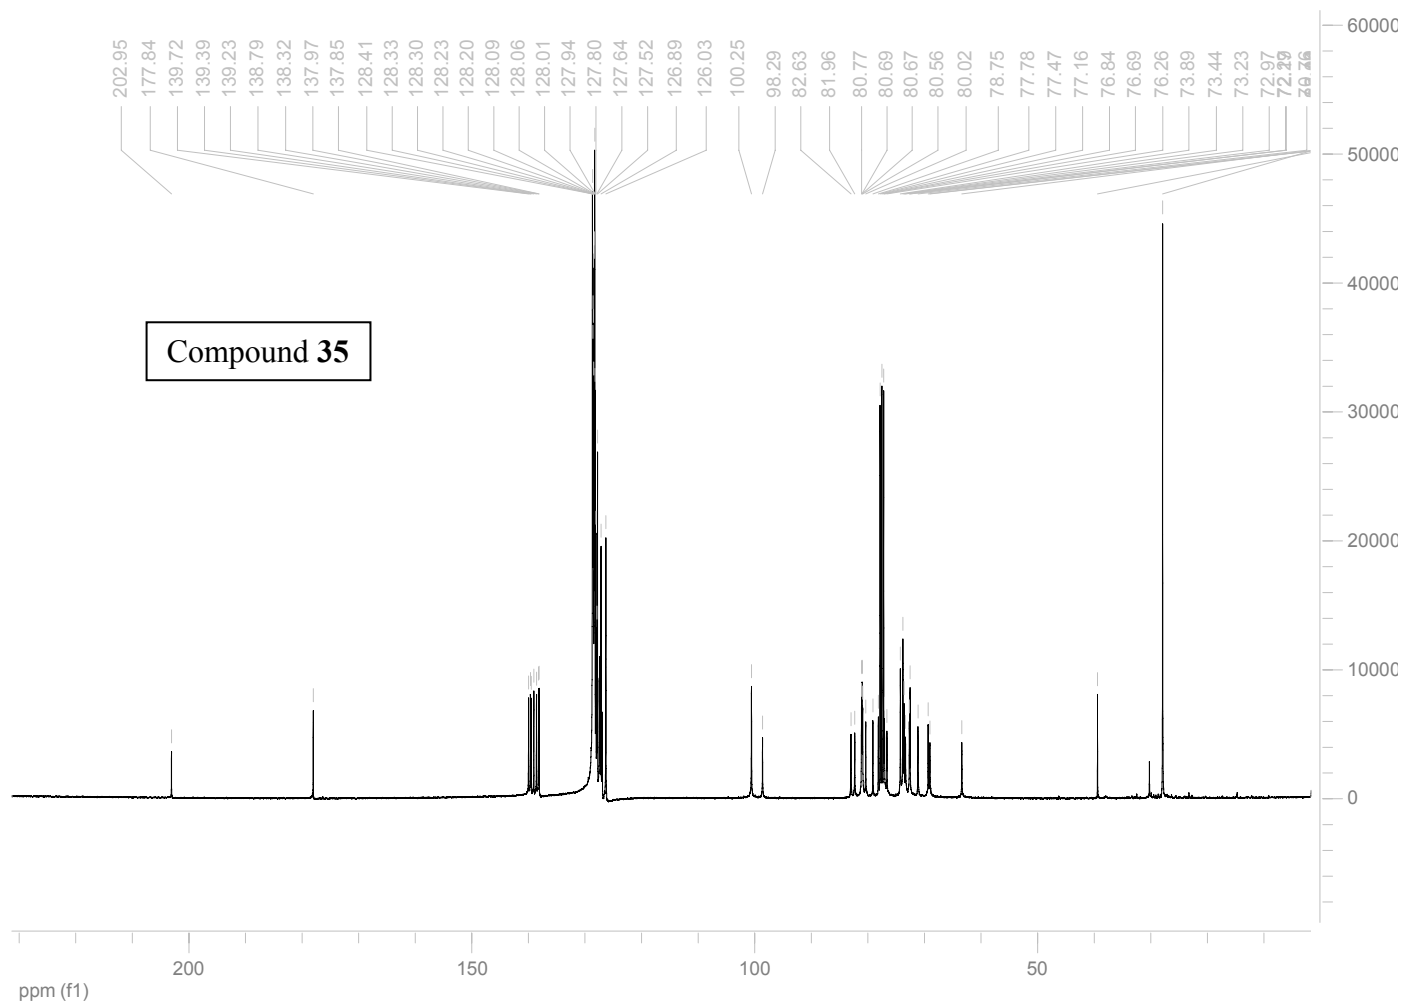

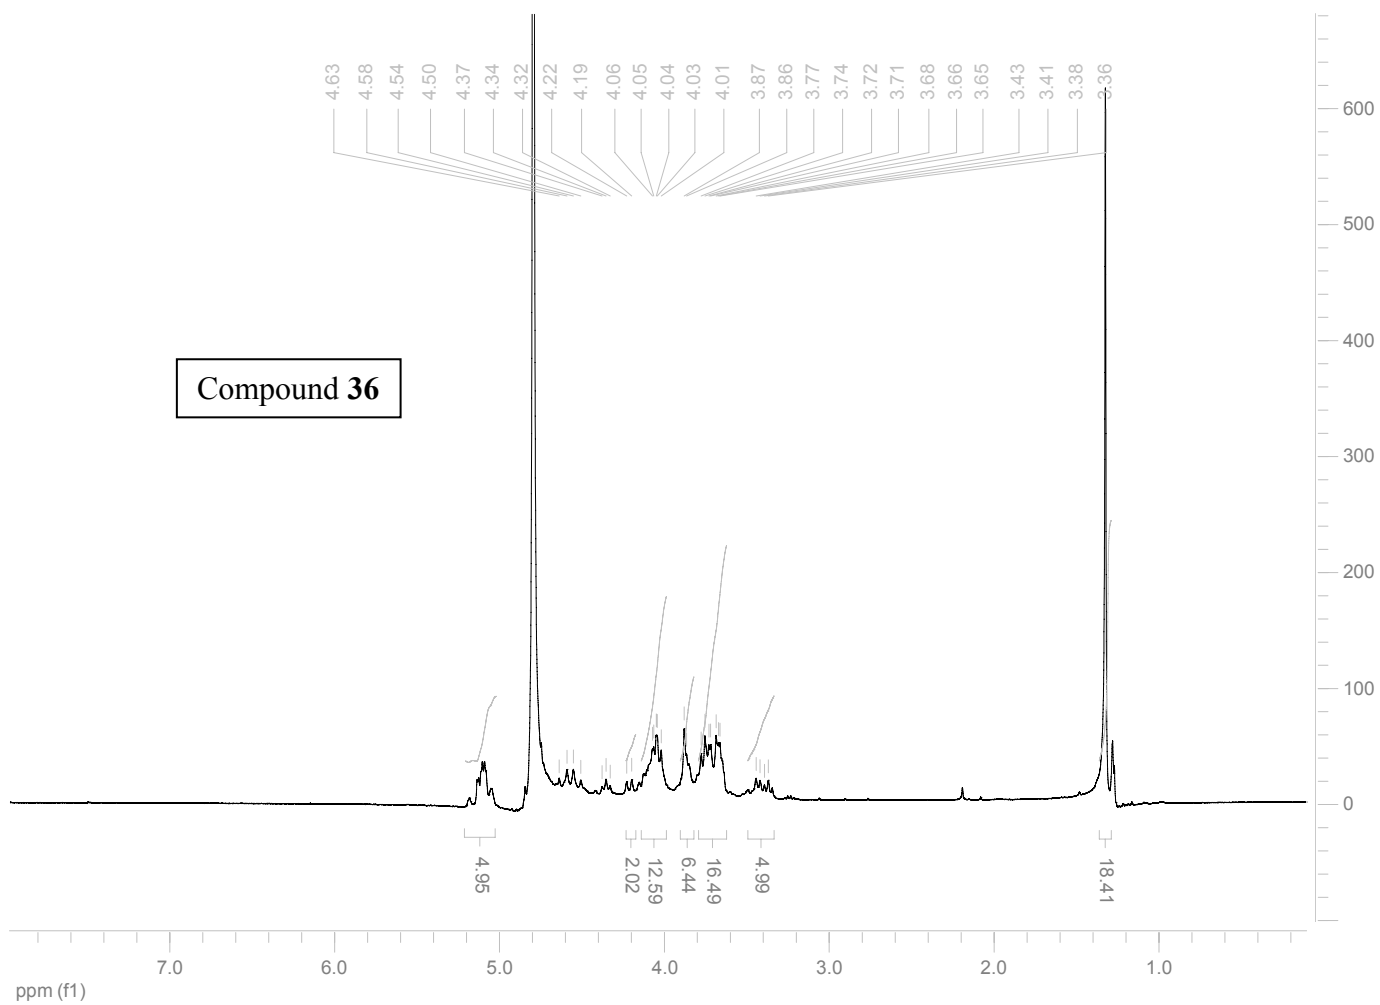

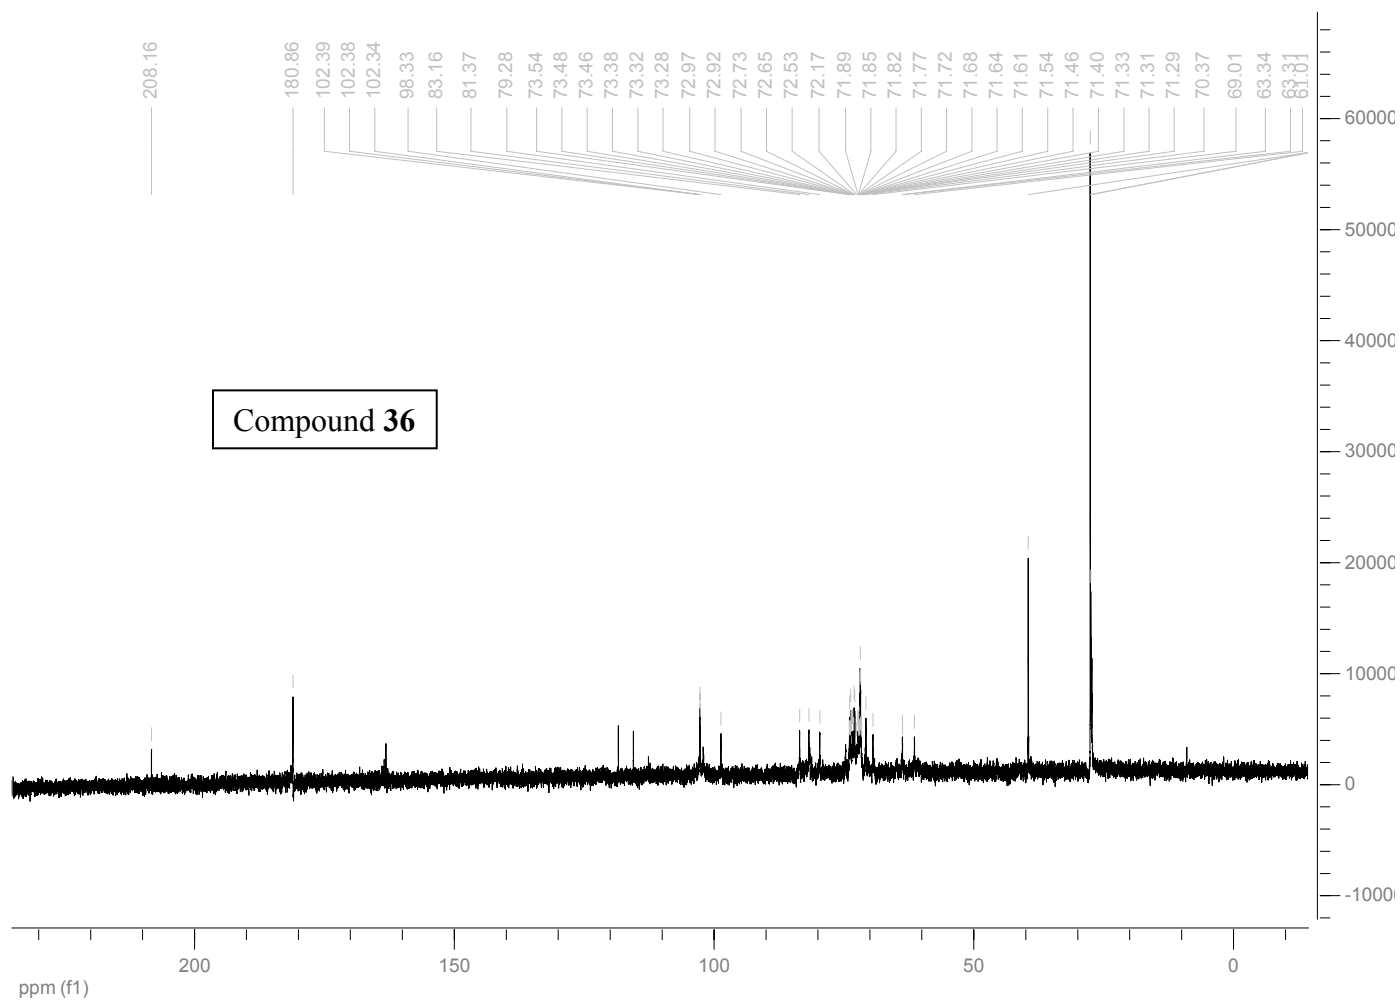

Supplement: b814245a.pdf [file b814245a.pdf]
